# Supplementary material
Source: publisher figshare collection journal article supplement (https://acs.figshare.com/ndownloader/files/7415452)
Supplement: Supplementary file 1 [file 7415452]

## Sheet: Table S-1
Table S-1: Relative peak areas of small subunit proteoforms (corresponding to the graphical depiction in Figure 5 and Figure S-1).
	Butler	Webb’s Price Nut	Katalonski
Isoform (N1, C3)
sSU1	100% (± 4)	100% (± 1)	55% (± 2)
sSU2 (R48S)	33% (± 4)	41% (± 1)	100% (± 6)
sSU3 (N56S)	-	-	41% (± 4)
N-Clipping (sSU1, C3)
N0	46% (± 1)	77% (± 0.2)	99% (± 5)
N1 (-Q)	100% (± 0.2)	100% (± 2)	100% (± 5)
N2 (-QQ)	26% (± 1)	16% (± 5)	12% (± 3)
N-Clipping (sSU2, C3)
N0	43% (± 1)	64% (± 2)	57% (± 7)
N1 (-Q)	100% (± 1)	100% (± 1)	100% (± 5)
N2 (-QQ)	17% (± 1)	12% (± 3)	20% (± 3)
N-Clipping (sSU3, C3)
N0	-	-	78% (± 4)
N1 (-Q)	-	-	100% (± 3)
N2 (-QQ)	-	-	19% (± 4)
C- Clipping (sSU1, N1)
C3 (-GSN)	100% (± 5)	100% (± 6)	100% (± 16)
C5 (-YDGSN)	-	9% (± 2)	18% (± 2)
C6 (-SYDGSN)	16% (± 3)	42% (± 13)	58% (± 9)
C7 (-GSYDGSN)	7% (± 1)	10% (± 2)	21% (± 8)
C8 (-YGSYDGSN)	2% (± 1)	29% (± 1)	94% (± 18)
C- Clipping (sSU2, N1)
C3 (-GSN)	100% (± 3)	100% (± 3)	100% (± 10)
C5 (-YDGSN)	2% (± 0.1)	6% (± 3)	10% (± 2)
C6 (-SYDGSN)	13% (± 2)	27% (± 4)	47% (± 7)
C7 (-GSYDGSN)	5% (± 0.4)	7% (± 0.4)	11% (± 1)
C8 (-YGSYDGSN)	-	18% (± 4)	43% (± 4)
C- Clipping (sSU3, N1)
C3 (-GSN)	-	-	100% (± 11)
C5 (-YDGSN)	-	-	-
C6 (-SYDGSN)	-	-	44% (± 16)
C7 (-GSYDGSN)	-	-	9% (± 4)
C8 (-YGSYDGSN)	-	-	36% (± 9)

## Sheet: Table S-2
Table S-2: Relative peak areas of large subunit proteoforms (corresponding to the graphical depiction in Figure 5 and Figure S-1).
	Butler	Webb’s Price Nut	Katalonski
Isoform & N-Clipping (C3)
lSU1-N0	74% (± 4)	35% (± 2)	62% (± 3)
lSU2-N0 (Q79H)	100% (± 7)	100% (± 2)	100% (± 4)
lSU1-N1 (-Q)	64% (± 2)	22% (± 1)	45% (± 2)
lSU2-N1 (Q79H, -Q)	31% (± 2)	21% (± 2)	24% (± 1)
lSU1/2-N2 (-QQ)	42% (± 3)	13% (± 1)	27% (± 0.1)
lSU1/2-N3 (-QQQ)	1% (± 0.3)	-	1% (± 0.3)
C- Clipping (lSU1, N)
C1 (-F)	95% (± 4)	16% (± 1)	14% (± 0.4)
C2 (-RF)	2% (± 0.1)	-	-
C3 (-ARF)	100% (± 3)	100% (± 1)	100% (± 0.7)
C- Clipping (lSU2, N0)
C1 (-F)	93% (± 1)	16% (± 1)	16% (± 0.7)
C2 (-RF)	2% (± 0.5)	-	-
C3 (-ARF)	100% (± 1)	100% (± 2)	100% (± 1)

## Sheet: Table S-3
Table S-3: Relative peak areas of Cor a 14 proteoforms (corresponding to the graphical depiction in Figure 6). Numbers indicate isobaric proteoforms.
			Butler	Webb’s Price Nut	Katalonski
sSU1-N0-C3	lSU1-N0-C1		34% (± 3)	5% (± 1)	-
	lSU1-N0-C3		47% (± 8)	17% (± 1)	22% (± 2)
	lSU1-N1-C1	1	61% (± 2)	5% (± 2)	-
	lSU1-N1-C3	2	60% (± 3)	17% (± 1)	26% (± 2)
	lSU2-N0-C1		65% (± 2)	26% (± 3)	21% (± 1)
	lSU2-N0-C3		51% (± 1)	87% (± 2)	65% (± 0.4)
	lSU2-N1-C1		11% (± 4)	8% (± 1)	6% (± 0.4)
	lSU2-N1-C3		21% (± 1)	50% (± 6)	36% (± 2)
	lSU1/2-N2-C1	3	37% (± 1)	-	-
	lSU1/2-N2-C3	4	47% (± 2)	14% (± 1)	24% (± 2)
sSU1-N0-C5	lSU1-N0-C1		-	-	-
	lSU1-N0-C3		-	-	-
	lSU1-N1-C1		-	-	-
	lSU1-N1-C3		-	-	-
	lSU2-N0-C1		-	-	-
	lSU2-N0-C3		-	8% (± 1)	8% (± 1)
	lSU2-N1-C1		-	-	-
	lSU2-N1-C3		-	-	-
	lSU1/2-N2-C1		-	-	-
	lSU1/2-N2-C3		-	-	-
sSU1-N0-C6	lSU1-N0-C1		-	-	-
	lSU1-N0-C3		-	-	-
	lSU1-N1-C1		-	-	-
	lSU1-N1-C3	5	15% (± 0.3)	10% (± 0.3)	18% (± 2)
	lSU2-N0-C1		-	-	-
	lSU2-N0-C3		11% (± 0.3)	32% (± 1)	33% (± 2)
	lSU2-N1-C1		-	-	-
	lSU2-N1-C3		-	18% (± 4)	16% (± 1)
	lSU1/2-N2-C1		-	-	-
	lSU1/2-N2-C3	6	12% (± 2)	6% (± 1)	18% (± 0.4)
sSU1-N0-C7	lSU1-N0-C1		-	-	-
	lSU1-N0-C3		-	-	-
	lSU1-N1-C1		-	-	-
	lSU1-N1-C3		-	-	-
	lSU2-N0-C1		-	-	-
	lSU2-N0-C3		-	-	-
	lSU2-N1-C1		-	-	-
	lSU2-N1-C3		-	-	-
	lSU1/2-N2-C1		-	-	-
	lSU1/2-N2-C3		-	-	-
sSU1-N0-C8	lSU1-N0-C1		-	-	-
	lSU1-N0-C3		-	-	-
	lSU1-N1-C1		-	-	-
	lSU1-N1-C3		-	-	-
	lSU2-N0-C1		-	-	-
	lSU2-N0-C3		-	23% (± 1)	40% (± 3)
	lSU2-N1-C1		-	-	-
	lSU2-N1-C3		-	-	-
	lSU1/2-N2-C1		-	-	-
	lSU1/2-N2-C3		-	-	-
sSU1-N1-C3	lSU1-N0-C1	1	61% (± 2)	5% (± 2)	-
	lSU1-N0-C3	2	60% (± 3)	17% (± 2)	27% (± 2)
	lSU1-N1-C1	3	37% (± 1)	-	-
	lSU1-N1-C3	4	47% (± 2)	14% (± 1)	24% (± 2)
	lSU2-N0-C1		87% (± 4)	20% (± 4)	11% (± 1)
	lSU2-N0-C3		100% (± 3)	100% (± 3)	67% (± 2)
	lSU2-N1-C1		37% (± 9)	10% (± 1)	-
	lSU2-N1-C3	7	43% (± 10)	37% (± 1)	26% (± 1)
	lSU1/2-N2-C1		14% (± 1)	-	-
	lSU1/2-N2-C3		22% (± 1)	10% (± 0.3)	16% (± 1)
sSU1-N1-C5	lSU1-N0-C1		-	-	-
	lSU1-N0-C3		-	-	-
	lSU1-N1-C1		-	-	-
	lSU1-N1-C3		-	-	-
	lSU2-N0-C1		-	-	-
	lSU2-N0-C3		-	11% (± 1)	11% (± 1)
	lSU2-N1-C1		-	-	-
	lSU2-N1-C3		-	-	-
	lSU1/2-N2-C1		-	-	-
	lSU1/2-N2-C3		-	-	-
sSU1-N1-C6	lSU1-N0-C1		-	-	-
	lSU1-N0-C3	5	15% (± 0.3)	10% (± 0.3)	18% (± 2)
	lSU1-N1-C1		-	-	-
	lSU1-N1-C3	6	12% (± 2)	6% (± 1)	18% (± 0.4)
	lSU2-N0-C1		-	-	-
	lSU2-N0-C3		18% (± 1)	37% (± 1)	33% (± 1)
	lSU2-N1-C1		-	-	-
	lSU2-N1-C3	8	8% (± 3)	13% (± 1)	13% (± 2)
	lSU1/2-N2-C1		-	-	-
	lSU1/2-N2-C3		6% (± 1)	3% (± 1)	-
sSU1-N1-C7	lSU1-N0-C1		-	-	-
	lSU1-N0-C3		-	-	-
	lSU1-N1-C1		-	-	-
	lSU1-N1-C3		-	-	-
	lSU2-N0-C1		-	-	-
	lSU2-N0-C3		-	12% (± 1)	-
	lSU2-N1-C1		-	-	-
	lSU2-N1-C3	9	4% (± 1)	-	-
	lSU1/2-N2-C1		-	-	-
	lSU1/2-N2-C3		-	-	-
sSU1-N1-C8	lSU1-N0-C1		-	-	-
	lSU1-N0-C3		-	-	-
	lSU1-N1-C1		-	-	-
	lSU1-N1-C3		-	-	-
	lSU2-N0-C1		-	-	-
	lSU2-N0-C3		6% (± 0.3)	27% (± 1)	57% (± 4)
	lSU2-N1-C1		-	-	-
	lSU2-N1-C3	10	2% (± 1)	10% (± 0.3)	28% (± 1)
	lSU1/2-N2-C1		-	-	-
	lSU1/2-N2-C3		-	-	-
sSU1-N2-C3	lSU1-N0-C1		-	-	-
	lSU1-N0-C3		-	-	-
	lSU1-N1-C1		-	-	-
	lSU1-N1-C3		13% (± 1)	8% (± 0.2)	-
	lSU2-N0-C1		-	-	-
	lSU2-N0-C3	7	43% (± 10)	37% (± 1)	26% (± 1)
	lSU2-N1-C1		-	-	-
	lSU2-N1-C3		-	-	-
	lSU1/2-N2-C1		-	-	-
	lSU1/2-N2-C3		-	-	-
sSU1-N2-C5	lSU1-N0-C1		-	-	-
	lSU1-N0-C3		-	-	-
	lSU1-N1-C1		-	-	-
	lSU1-N1-C3		-	-	-
	lSU2-N0-C1		-	-	-
	lSU2-N0-C3		-	-	-
	lSU2-N1-C1		-	-	-
	lSU2-N1-C3		-	-	-
	lSU1/2-N2-C1		-	-	-
	lSU1/2-N2-C3		-	-	-
sSU1-N2-C6	lSU1-N0-C1		-	-	-
	lSU1-N0-C3		-	-	-
	lSU1-N1-C1		-	-	-
	lSU1-N1-C3		-	-	-
	lSU2-N0-C1		-	-	-
	lSU2-N0-C3	8	8% (± 3)	13% (± 1)	13% (± 2)
	lSU2-N1-C1		-	-	-
	lSU2-N1-C3		-	-	-
	lSU1/2-N2-C1		-	-	-
	lSU1/2-N2-C3		-	-	-
sSU1-N2-C7	lSU1-N0-C1		-	-	-
	lSU1-N0-C3		-	-	-
	lSU1-N1-C1		-	-	-
	lSU1-N1-C3		-	-	-
	lSU2-N0-C1		-	-	-
	lSU2-N0-C3	9	4% (± 1)	-	-
	lSU2-N1-C1		-	-	-
	lSU2-N1-C3		-	-	-
	lSU1/2-N2-C1		-	-	-
	lSU1/2-N2-C3		-	-	-
sSU1-N2-C8	lSU1-N0-C1		-	-	-
	lSU1-N0-C3		-	-	-
	lSU1-N1-C1		-	-	-
	lSU1-N1-C3		-	-	-
	lSU2-N0-C1		-	-	-
	lSU2-N0-C3	10	2% (± 1)	10% (± 0.3)	28% (± 1)
	lSU2-N1-C1		-	-	-
	lSU2-N1-C3		-	-	-
	lSU1/2-N2-C1		-	-	-
	lSU1/2-N2-C3		-	-	-
sSU2-N0-C3	lSU1-N0-C1		33% (± 1)	8% (± 1)	-
	lSU1-N0-C3		32% (± 3)	28% (± 1)	69% (± 2)
	lSU1-N1-C1	11	59% (± 6)	-	-
	lSU1-N1-C3	12	67% (± 6)	39% (± 0.2)	100% (± 2)
	lSU2-N0-C1		-	-	-
	lSU2-N0-C3		-	-	-
	lSU2-N1-C1		-	-	-
	lSU2-N1-C3		-	-	-
	lSU1/2-N2-C1		35% (± 1)	-	-
	lSU1/2-N2-C3	13	55% (± 5)	25% (± 1)	75% (± 2)
sSU2-N0-C5	lSU1-N0-C1		-	-	-
	lSU1-N0-C3		-	-	-
	lSU1-N1-C1		-	-	-
	lSU1-N1-C3		-	-	-
	lSU2-N0-C1		-	-	-
	lSU2-N0-C3		-	-	-
	lSU2-N1-C1		-	-	-
	lSU2-N1-C3		-	-	-
	lSU1/2-N2-C1		-	-	-
	lSU1/2-N2-C3		-	-	-
sSU2-N0-C6	lSU1-N0-C1		-	-	-
	lSU1-N0-C3		-	-	-
	lSU1-N1-C1		-	-	-
	lSU1-N1-C3	14	-	13% (± 0.3)	44% (± 3)
	lSU2-N0-C1		-	-	-
	lSU2-N0-C3		-	-	-
	lSU2-N1-C1		-	-	-
	lSU2-N1-C3		-	-	-
	lSU1/2-N2-C1		-	-	-
	lSU1/2-N2-C3	15	10% (± 2)	7% (± 0.1)	26% (± 3)
sSU2-N0-C7	lSU1-N0-C1		-	-	-
	lSU1-N0-C3		-	-	-
	lSU1-N1-C1		-	-	-
	lSU1-N1-C3		-	-	-
	lSU2-N0-C1		-	-	-
	lSU2-N0-C3		-	-	-
	lSU2-N1-C1		-	-	-
	lSU2-N1-C3		-	-	-
	lSU1/2-N2-C1		-	-	-
	lSU1/2-N2-C3		-	-	-
sSU2-N0-C8	lSU1-N0-C1		-	-	-
	lSU1-N0-C3		-	-	-
	lSU1-N1-C1		-	-	-
	lSU1-N1-C3	16	-	6% (± 0.1)	32% (± 4)
	lSU2-N0-C1		-	-	-
	lSU2-N0-C3		-	-	-
	lSU2-N1-C1		-	-	-
	lSU2-N1-C3		-	-	-
	lSU1/2-N2-C1		-	-	-
	lSU1/2-N2-C3	17	-	4% (± 0.4)	26% (± 3)
sSU2-N1-C3	lSU1-N0-C1	11	59% (± 6)	-	-
	lSU1-N0-C3	12	67% (± 6)	39% (± 0.2)	100% (± 2)
	lSU1-N1-C1		-	-	-
	lSU1-N1-C3	13	55% (± 5)	25% (± 1.2)	75% (± 2)
	lSU2-N0-C1		-	-	-
	lSU2-N0-C3		-	-	-
	lSU2-N1-C1		-	-	-
	lSU2-N1-C3		-	-	-
	lSU1/2-N2-C1		-	-	-
	lSU1/2-N2-C3		27% (± 2)	11% (± 0.1)	42% (± 2)
sSU2-N1-C5	lSU1-N0-C1		-	-	-
	lSU1-N0-C3		-	-	-
	lSU1-N1-C1		-	-	-
	lSU1-N1-C3		-	-	-
	lSU2-N0-C1		-	-	-
	lSU2-N0-C3		-	-	-
	lSU2-N1-C1		-	-	-
	lSU2-N1-C3		-	-	-
	lSU1/2-N2-C1		-	-	-
	lSU1/2-N2-C3		-	-	-
sSU2-N1-C6	lSU1-N0-C1		-	-	-
	lSU1-N0-C3	14	-	13% (± 0.3)	44% (± 3)
	lSU1-N1-C1		-	-	-
	lSU1-N1-C3	15	10% (± 2)	7% (± 1)	26% (± 3)
	lSU2-N0-C1		-	-	-
	lSU2-N0-C3		-	-	-
	lSU2-N1-C1		-	-	-
	lSU2-N1-C3		-	-	-
	lSU1/2-N2-C1		-	-	-
	lSU1/2-N2-C3		-	3% (± 0.4)	16% (± 2)
sSU2-N1-C7	lSU1-N0-C1		-	-	-
	lSU1-N0-C3		-	-	-
	lSU1-N1-C1		-	-	-
	lSU1-N1-C3		-	-	-
	lSU2-N0-C1		-	-	-
	lSU2-N0-C3		-	-	-
	lSU2-N1-C1		-	-	-
	lSU2-N1-C3		-	-	-
	lSU1/2-N2-C1		-	-	-
	lSU1/2-N2-C3		-	-	-
sSU2-N1-C8	lSU1-N0-C1		-	-	-
	lSU1-N0-C3	16	-	6% (± 0.1)	32% (± 4)
	lSU1-N1-C1		-	-	-
	lSU1-N1-C3	17	-	4% (± 0.4)	26% (± 3)
	lSU2-N0-C1		-	-	-
	lSU2-N0-C3		-	-	-
	lSU2-N1-C1		-	-	-
	lSU2-N1-C3		-	-	-
	lSU1/2-N2-C1		-	-	-
	lSU1/2-N2-C3		-	-	-
sSU2-N2-C3	lSU1-N0-C1		4% (± 1)	-	-
	lSU1-N0-C3		10% (± 0.3)	10% (± 1)	27% (± 1)
	lSU1-N1-C1		-	-	-
	lSU1-N1-C3		6% (± 1.1)	-	-
	lSU2-N0-C1		-	-	-
	lSU2-N0-C3		-	-	-
	lSU2-N1-C1		-	-	-
	lSU2-N1-C3		-	-	-
	lSU1/2-N2-C1		-	-	-
	lSU1/2-N2-C3		-	-	-
sSU2-N2-C5	lSU1-N0-C1		-	-	-
	lSU1-N0-C3		-	-	-
	lSU1-N1-C1		-	-	-
	lSU1-N1-C3		-	-	-
	lSU2-N0-C1		-	-	-
	lSU2-N0-C3		-	-	-
	lSU2-N1-C1		-	-	-
	lSU2-N1-C3		-	-	-
	lSU1/2-N2-C1		-	-	-
	lSU1/2-N2-C3		-	-	-
sSU2-N2-C6	lSU1-N0-C1		-	-	-
	lSU1-N0-C3		-	-	-
	lSU1-N1-C1		-	-	-
	lSU1-N1-C3		-	-	-
	lSU2-N0-C1		-	-	-
	lSU2-N0-C3		-	-	-
	lSU2-N1-C1		-	-	-
	lSU2-N1-C3		-	-	-
	lSU1/2-N2-C1		-	-	-
	lSU1/2-N2-C3		-	-	-
sSU2-N2-C7	lSU1-N0-C1		-	-	-
	lSU1-N0-C3		-	-	-
	lSU1-N1-C1		-	-	-
	lSU1-N1-C3		-	-	-
	lSU2-N0-C1		-	-	-
	lSU2-N0-C3		-	-	-
	lSU2-N1-C1		-	-	-
	lSU2-N1-C3		-	-	-
	lSU1/2-N2-C1		-	-	-
	lSU1/2-N2-C3		-	-	-
sSU2-N2-C8	lSU1-N0-C1		-	-	-
	lSU1-N0-C3		-	-	-
	lSU1-N1-C1		-	-	-
	lSU1-N1-C3		-	-	-
	lSU2-N0-C1		-	-	-
	lSU2-N0-C3		-	-	-
	lSU2-N1-C1		-	-	-
	lSU2-N1-C3		-	-	-
	lSU1/2-N2-C1		-	-	-
	lSU1/2-N2-C3		-	-	-
sSU3-N0-C3	lSU1-N0-C1		-	-	-
	lSU1-N0-C3		-	-	-
	lSU1-N1-C1		-	-	-
	lSU1-N1-C3		-	-	-
	lSU2-N0-C1		-	-	18% (± 4)
	lSU2-N0-C3		-	-	44% (± 5)
	lSU2-N1-C1		-	-	-
	lSU2-N1-C3		-	-	16% (± 3)
	lSU1/2-N2-C1		-	-	-
	lSU1/2-N2-C3		-	-	-
sSU3-N0-C5	lSU1-N0-C1		-	-	-
	lSU1-N0-C3		-	-	-
	lSU1-N1-C1		-	-	-
	lSU1-N1-C3		-	-	-
	lSU2-N0-C1		-	-	-
	lSU2-N0-C3		-	-	-
	lSU2-N1-C1		-	-	-
	lSU2-N1-C3		-	-	-
	lSU1/2-N2-C1		-	-	-
	lSU1/2-N2-C3		-	-	-
sSU3-N0-C6	lSU1-N0-C1		-	-	-
	lSU1-N0-C3		-	-	-
	lSU1-N1-C1		-	-	-
	lSU1-N1-C3		-	-	-
	lSU2-N0-C1		-	-	-
	lSU2-N0-C3		-	-	16% (± 1)
	lSU2-N1-C1		-	-	-
	lSU2-N1-C3		-	-	-
	lSU1/2-N2-C1		-	-	-
	lSU1/2-N2-C3		-	-	-
sSU3-N0-C7	lSU1-N0-C1		-	-	-
	lSU1-N0-C3		-	-	-
	lSU1-N1-C1		-	-	-
	lSU1-N1-C3		-	-	-
	lSU2-N0-C1		-	-	-
	lSU2-N0-C3		-	-	-
	lSU2-N1-C1		-	-	-
	lSU2-N1-C3		-	-	-
	lSU1/2-N2-C1		-	-	-
	lSU1/2-N2-C3		-	-	-
sSU3-N0-C8	lSU1-N0-C1		-	-	-
	lSU1-N0-C3		-	-	-
	lSU1-N1-C1		-	-	-
	lSU1-N1-C3		-	-	-
	lSU2-N0-C1		-	-	-
	lSU2-N0-C3		-	-	19% (± 0.2)
	lSU2-N1-C1		-	-	-
	lSU2-N1-C3		-	-	-
	lSU1/2-N2-C1		-	-	-
	lSU1/2-N2-C3		-	-	-
sSU3-N1-C3	lSU1-N0-C1		-	-	-
	lSU1-N0-C3		-	-	-
	lSU1-N1-C1		-	-	-
	lSU1-N1-C3		-	-	-
	lSU2-N0-C1		-	-	13% (± 3)
	lSU2-N0-C3		-	-	47% (± 4)
	lSU2-N1-C1		-	-	-
	lSU2-N1-C3		-	-	21% (± 2)
	lSU1/2-N2-C1		-	-	-
	lSU1/2-N2-C3		-	-	-
sSU3-N1-C5	lSU1-N0-C1		-	-	-
	lSU1-N0-C3		-	-	-
	lSU1-N1-C1		-	-	-
	lSU1-N1-C3		-	-	-
	lSU2-N0-C1		-	-	-
	lSU2-N0-C3		-	-	-
	lSU2-N1-C1		-	-	-
	lSU2-N1-C3		-	-	-
	lSU1/2-N2-C1		-	-	-
	lSU1/2-N2-C3		-	-	-
sSU3-N1-C6	lSU1-N0-C1		-	-	-
	lSU1-N0-C3		-	-	-
	lSU1-N1-C1		-	-	-
	lSU1-N1-C3		-	-	-
	lSU2-N0-C1		-	-	-
	lSU2-N0-C3		-	-	15% (± 1)
	lSU2-N1-C1		-	-	-
	lSU2-N1-C3		-	-	-
	lSU1/2-N2-C1		-	-	-
	lSU1/2-N2-C3		-	-	-
sSU3-N1-C7	lSU1-N0-C1		-	-	-
	lSU1-N0-C3		-	-	-
	lSU1-N1-C1		-	-	-
	lSU1-N1-C3		-	-	-
	lSU2-N0-C1		-	-	-
	lSU2-N0-C3		-	-	-
	lSU2-N1-C1		-	-	-
	lSU2-N1-C3		-	-	-
	lSU1/2-N2-C1		-	-	-
	lSU1/2-N2-C3		-	-	-
sSU3-N1-C8	lSU1-N0-C1		-	-	-
	lSU1-N0-C3		-	-	-
	lSU1-N1-C1		-	-	-
	lSU1-N1-C3		-	-	-
	lSU2-N0-C1		-	-	-
	lSU2-N0-C3		-	-	27% (± 2)
	lSU2-N1-C1		-	-	-
	lSU2-N1-C3		-	-	-
	lSU1/2-N2-C1		-	-	-
	lSU1/2-N2-C3		-	-	-
sSU3-N2-C3	lSU1-N0-C1		-	-	-
	lSU1-N0-C3		-	-	-
	lSU1-N1-C1		-	-	-
	lSU1-N1-C3		-	-	-
	lSU2-N0-C1		-	-	-
	lSU2-N0-C3		-	-	-
	lSU2-N1-C1		-	-	-
	lSU2-N1-C3		-	-	-
	lSU1/2-N2-C1		-	-	-
	lSU1/2-N2-C3		-	-	-
sSU3-N2-C5	lSU1-N0-C1		-	-	-
	lSU1-N0-C3		-	-	-
	lSU1-N1-C1		-	-	-
	lSU1-N1-C3		-	-	-
	lSU2-N0-C1		-	-	-
	lSU2-N0-C3		-	-	-
	lSU2-N1-C1		-	-	-
	lSU2-N1-C3		-	-	-
	lSU1/2-N2-C1		-	-	-
	lSU1/2-N2-C3		-	-	-
sSU3-N2-C6	lSU1-N0-C1		-	-	-
	lSU1-N0-C3		-	-	-
	lSU1-N1-C1		-	-	-
	lSU1-N1-C3		-	-	-
	lSU2-N0-C1		-	-	-
	lSU2-N0-C3		-	-	-
	lSU2-N1-C1		-	-	-
	lSU2-N1-C3		-	-	-
	lSU1/2-N2-C1		-	-	-
	lSU1/2-N2-C3		-	-	-
sSU3-N2-C7	lSU1-N0-C1		-	-	-
	lSU1-N0-C3		-	-	-
	lSU1-N1-C1		-	-	-
	lSU1-N1-C3		-	-	-
	lSU2-N0-C1		-	-	-
	lSU2-N0-C3		-	-	-
	lSU2-N1-C1		-	-	-
	lSU2-N1-C3		-	-	-
	lSU1/2-N2-C1		-	-	-
	lSU1/2-N2-C3		-	-	-
sSU3-N2-C8	lSU1-N0-C1		-	-	-
	lSU1-N0-C3		-	-	-
	lSU1-N1-C1		-	-	-
	lSU1-N1-C3		-	-	-
	lSU2-N0-C1		-	-	-
	lSU2-N0-C3		-	-	-
	lSU2-N1-C1		-	-	-
	lSU2-N1-C3		-	-	-
	lSU1/2-N2-C1		-	-	-
	lSU1/2-N2-C3		-	-	-

## Sheet: Table S-4
Table S-4: Peptide sequences assigned to Cor a 14 (UniProt #D0PWG2, avg. mass 17078 Da) identified by bottom-up approach using PEAKS 7 Spider algorithm.
Peptide	-10lgP	Mass [Da]	m/z	Δ [ppm]	RT [min]
Butler, Tryptic Digest 1 [106 spectra & 56 peptides assigned (56 unique) / 72% sequence coverage / -10lgP = 441.18]
Q(-17.03)AVMQQQGEM(+15.99)RGEEMR	136.69	1905.81	636.278	0	48.38
Q(+43.01)AVMQQQGEMR	129.01	1347.6	674.808	-0.1	48.68
H(sub Q)QQQELEQC(+57.02)C(+57.02)QQLR	120.63	1883.84	942.925	-0.2	46.89
QAVMQQQGE(+14.02)MR	118.57	1318.61	660.313	-0.4	47.44
TTITTVDVDEDIVNQQGR	117.88	2002.98	1002.5	0	63.28
Q(-17.03)AVMQQQGEMRGEEMR	116.61	1889.82	630.946	-1.6	52.73
Q(-17.03)QQQQELEQC(+57.02)C(+57.02)QQLR	114.79	1985.87	662.963	-0.4	55.67
Q(-17.03)AVMQQQGEMR	112.33	1287.57	644.792	-0.6	49.66
Q(-17.03)QELEQC(+57.02)C(+57.02)QQLR	107.57	1601.69	801.854	-0.1	56.02
Q(-17.03)AVM(+15.99)QQQGEMR	105.18	1303.56	652.789	-0.8	45.81
Q(-17.03)QQQELEQC(+57.02)C(+57.02)QQLR	99.23	1857.81	620.277	-1.2	55.59
Q(-17.03)AVMQQ(+.98)QGEMR	98.36	1288.55	645.283	-1.8	50.62
QAVM(+15.99)QQQGEMR	97.47	1320.59	661.302	-0.9	44.45
Q(+.98)QQQQELEQC(+57.02)C(+57.02)QQLR	92.91	2003.88	668.967	-0.4	49.62
GEEM(+15.99)REVMETAR	90.14	1452.63	727.324	-0.3	45.6
ITTVDVDEDIVNQQGR	89.1	1800.89	901.45	-0.4	60.31
QAVM(+15.99)QQQGEMRGEEMR	88.49	1922.84	641.953	-0.6	45.65
Q(-17.03)QNLNQC(+57.02)QR	87.56	1170.52	586.267	-0.6	44.71
Q(-17.03)QQELEQC(+57.02)C(+57.02)QQLR	87.04	1729.75	577.59	-1.7	56.66
QAVM(+15.99)QQQGEM(+15.99)R	85.68	1336.59	669.3	-1.3	35.82
QAVMQQQGEMR	84.63	1304.6	435.873	-0.8	45.93
GEEMREVMETAR	84.25	1436.64	719.326	-0.4	50.45
QAVM(-48.00)QQQGEMR	81.81	1256.59	629.303	-1.7	39.8
E(+43.01)VMETAR	78.89	877.396	439.705	-0.9	47.69
QAVMQQQGEMRGEEMR	77.45	1906.84	636.621	-1.8	47.86
RQAVMQQQGEMR	76.13	1460.7	731.356	0.3	45.25
Q(-17.03)AVMQ(+.98)QQGEMRGEEMR	74.18	1890.8	946.41	1.6	56.5
D(+43.01)LPNQC(+57.02)R	72.56	944.413	473.213	-1.6	45.69
QQNLN(+.98)QC(+57.02)QR	72.06	1188.53	595.272	-0.9	36.91
E(-18.01)VMETAR	70.84	816.38	409.197	-1.4	43.91
Q(+43.01)AVMQQQGEMRGEEMR	70.73	1949.85	975.932	-0.4	52.55
Q(+.98)QNLNQC(+57.02)QR	70.31	1188.53	595.272	-1.3	40.75
E(-18.01)VM(+15.99)ETAR	67.34	832.375	417.194	-1.7	19.45
QC(+57.02)C(+57.02)QQLR	67.31	991.433	496.723	-1.6	50.18
DLPN(+.98)QC(+57.02)R	66.79	902.392	452.202	-1.2	44.72
QQNLNQC(+57.02)QR	66.65	1187.55	396.856	-1	39.77
Q(-17.03)QSQYGSYD	66.5	1057.4	529.706	-0.8	46.51
EVMETAR	62.49	834.391	418.202	-1.3	43.17
C(+57.02)C(+57.02)QQLR	61.67	863.374	432.693	-2.9	50.3
VMQQQGEMRGEEMR	60.6	1707.75	854.882	0.1	47.54
D(+27.99)LPNQC(+57.02)R	58.66	929.403	465.708	-0.7	46.17
DLPN(-17.03)QC(+57.02)R	57.52	884.381	443.197	-1.8	41.42
DLPNQC(+57.02)R	57.33	901.408	451.711	-0.5	41.93
VMETAR	57.31	705.348	353.681	-0.2	41.21
Q(+42.01)QQQQ(+.98)ELEQC(+57.02)C(+57.02)QQLR	56.85	2045.89	682.97	-1.3	46.9
C(+57.02)RC(+57.02)EGLR	54.94	949.422	317.481	-0.3	35.15
EMREVMETAR	54.85	1250.57	626.294	-0.3	50.49
EVM(+15.99)ETAR	54.38	850.385	426.2	-1.2	20.51
GESC(+57.02)S(sub R)EQAQR	53.42	1150.47	576.241	0	15.54
Q(+43.01)MDER	52.74	720.286	361.15	-0.2	31.37
QMDER	51.93	677.28	339.647	-2.7	5.33
QQQQQEP(sub L)EQC(+57.02)C(+57.02)QQLR	50.87	1986.86	663.293	-2.9	56.88
QQQGEMRGEEMR	50.38	1477.64	739.827	-0.2	47.52
QQSQYGSYDGSN	50.34	1332.52	667.268	-0.8	45.02
MQQQGEMR	49.97	1006.43	504.222	-2.3	49.37
LPNQC(+57.02)R	48.65	786.381	394.197	-1.1	41.25
Butler, Tryptic Digest 2 [87 spectra & 56 peptides assigned (56 unique) / 62% sequence coverage / -10lgP = 417.44]
TTITTVDVDEDIVNQQGR	133.27	2002.98	668.667	-0.8	64.25
H(sub Q)QQQELEQC(+57.02)C(+57.02)QQLR	123.68	1883.84	942.926	0.5	45.14
Q(+43.01)AVMQQQGEMR	103.05	1347.6	674.808	-0.2	47.36
QAVMQQQGEMRGEEMR	101.27	1906.84	636.622	0	46.26
QAVM(+15.99)QQQGEMR	100.81	1320.59	661.302	-1.2	41.84
QAVMQQQGEM(+15.99)R	100.73	1320.59	441.204	-1.3	41.93
QAVM(+15.99)QQQGEMRGEEMR	98.27	1922.84	641.953	-0.7	43.58
TVDVDEDIVNQQGR	97.29	1586.75	794.384	-0.5	56.29
Q(-17.03)AVMQQQGEMR	96.59	1287.57	644.791	-1.4	48.43
QAVM(+15.99)QQQGEM(+15.99)R	95.93	1336.59	669.3	-0.7	34.36
QP(sub A)VMQQQGEMR	94.79	1330.61	666.313	-0.3	45.42
QAVMQQQGEMR	93.66	1304.6	435.872	-1.7	43.8
QAL(sub V)MQQQGEMR	91.26	1318.61	660.313	-0.9	45.76
GEEMREVMETAR	90.71	1436.64	479.886	-2	50.01
QAVMQQQ(+.98)GEMR	89.06	1305.58	653.796	-2	44.73
Q(-17.03)QELEQC(+57.02)C(+57.02)QQLR	88.65	1601.69	801.854	0.5	56.15
QQH(sub Q)QELEQC(+57.02)C(+57.02)QQLR	88.11	1883.84	628.952	-0.5	45.13
Q(-17.03)QQQQELEQC(+57.02)C(+57.02)QQLR	87.89	1985.87	662.963	-0.8	53.42
Q(-17.03)AVMQQQGEMRGEEMR	85.77	1889.82	630.946	-1.5	52.71
Q(+43.01)QNLNQC(+57.02)QR	84.04	1230.55	616.283	-1.2	41.92
Q(-17.03)QQQELEQC(+57.02)C(+57.02)QQLR	83.74	1857.81	929.913	0.5	53.39
GEEM(+15.99)REVMETAR	82.07	1452.63	485.217	-2.1	43.41
QQQELEQC(+57.02)C(+57.02)QQLR	80.19	1746.78	583.266	-1.2	46.6
Q(+.98)QQQQELEQC(+57.02)C(+57.02)QQLR	76.38	2003.88	668.966	-1.4	49.03
LEQC(+57.02)C(+57.02)QQLR	71.92	1233.56	617.787	-0.6	43.27
Q(-17.03)AVM(+15.99)QQQGEMR	71.37	1303.56	652.789	-1.1	43.59
Q(+380.15)QELEQC(+57.02)C(+57.02)QQLR	71.25	1998.87	667.295	-1.8	47.01
QQQQQE(+37.03)LEQC(+57.02)C(+57.02)QQLR	68.82	2039.93	680.983	0.3	47.33
QQQQELEQC(+57.02)C(+57.02)QQLR	65.73	1874.84	625.952	-1.5	47.25
EVMETAR	65.47	834.391	418.202	-0.8	40.81
QAVMQQQGEM(+15.99)RGEEM(+15.99)R	64.49	1938.83	647.285	-0.2	41.97
D(+43.01)LPNQC(+57.02)R	62.79	944.413	473.213	-2	43.37
Q(-17.03)QNLNQC(+57.02)QR	62.54	1170.52	586.267	-0.9	41.98
QQNLNQC(+57.02)QR	62.29	1187.55	594.779	-1.8	38.56
QC(+57.02)C(+57.02)QQLR	62.23	991.433	496.723	-1	38.2
QAVM(-48.00)QQQGEMRGEEMR	61.58	1858.84	465.717	-1.6	42.28
QAVMQQQGEL(sub M)R	60.59	1286.64	644.326	-1.8	46.01
Q(+380.15)QQELEQC(+57.02)C(+57.02)QQLR	60	2126.92	709.98	-2.5	47.3
DLPNQC(+57.02)R	59.24	901.408	451.71	-1.4	41.25
Q(-17.03)ELEQC(+57.02)C(+57.02)QQLR	57.65	1473.63	737.824	-0.3	51.98
C(+57.02)RC(+57.02)EGLR	57.63	949.422	317.481	0.2	33.41
QAVM(-48.00)QQQGEMR	56.69	1256.59	629.303	-1.3	38.72
EVM(+15.99)ETAR	55.01	850.385	426.199	-1.5	16.53
QNLNQC(+57.02)QR	54.11	1059.49	530.751	-0.3	34.19
E(-18.01)VM(+15.99)ETAR	53.46	832.375	417.194	-1.1	19.07
VMETAR	52.98	705.348	353.681	-1.1	41.21
MQQQGEMR	52.95	1006.43	504.223	-1.3	48.25
VM(+15.99)ETAR	51.33	721.343	361.678	-1.3	19.37
LPNQC(+57.02)R	51.17	786.381	394.197	-2.1	41.62
E(-18.01)LEQC(+57.02)C(+57.02)QQLR	51	1344.59	673.302	-1.7	51.72
E(+43.01)VMETAR	49.97	877.396	439.705	-1.4	45.92
Q(-17.03)AVMQQQGEM(+15.99)RGEEMR	49.92	1905.81	636.278	-1.2	47.41
QQSQYGSYDGSN	49.81	1332.52	667.268	-0.2	42.56
QAVMQQQGEMRGEEM(+15.99)R	48.69	1922.84	962.428	0.4	43.63
C(+57.02)EGLR	48.42	633.29	317.652	-0.4	25.86
QQQGEMR	47.32	875.392	438.703	-0.8	48.32
Butler, GluC Digest 1 [144 spectra & 106 peptides assigned (106 unique) / 80% sequence coverage / -10lgP = 479.11]
Q(-17.03)AQRQQNLNQC(+57.02)QRYMRQQSQY	134.82	2738.25	685.571	1.6	41.77
TARDLPN(+.98)QC(+57.02)RLSPQRC(+57.02)E	133.47	2100.98	526.252	-0.7	38.91
GLRQAVMQQQGEM(-48.00)RGEE	125.23	1897.91	475.484	-0.2	37.48
G(+43.01)LRQAVMQQQGEM(+15.99)RGEE	109.59	2004.91	669.312	2.5	48.97
G(+43.01)LRQAVMQQQGE	106.68	1386.67	694.342	1.2	49.44
T(+43.01)ARDLPNQC(+57.02)RLSPQRC(+57.02)E	106.6	2143	715.342	1.1	41.37
Q(-17.03)AQRQQNLNQC(+57.02)QRYM(+15.99)RQQSQYGSYD	106.09	3176.39	795.106	1	39.27
T(+27.99)ARDLPNQC(+57.02)RLSPQRC(+57.02)E	103.67	2127.99	710.339	2.5	41.85
TARDLPNQC(+57.02)RLSPQRC(+57.02)E	101.02	2100	526.006	-0.5	38.31
TARDLPNQC(+57.02)RLSPQ(+.98)	99.19	1655.8	828.911	1.1	39.99
Q(-17.03)AQRQQNLNQC(+57.02)QRYMRQQSQYG	98.81	2795.27	932.766	1.7	40.99
GLRQAVMQQQGEM(+15.99)RGEE	98.51	1961.9	654.976	0.9	39.1
Q(-17.03)AQRQQNLNQC(+57.02)QRYMRQQSQ	97.54	2575.19	859.404	0.7	38.19
Q(-17.03)AQRQQNLNQC(+57.02)QRYM	96.07	1947.88	974.95	3.1	41.28
GLRQAVMQQQGEM(+15.99)RGEEM(+15.99)RE	95.07	2394.08	599.528	-0.1	38.47
QAQRQQNLN(+.98)QC(+57.02)QRYMRQQSQYGSYD	93.47	3178.41	795.61	1.4	40.56
L(+27.99)EQC(+57.02)C(+57.02)QQLRQMDE	93.03	1764.72	883.37	1.9	54
QAQRQQNLNQC(+57.02)QRYMRQ(+.98)	92.89	2250.05	563.52	-0.1	37.34
GLRQ(+.98)AVMQQQGE	90.09	1344.65	673.33	-0.7	40.48
GLRQAVM(+15.99)QQQGE	89.67	1359.66	680.836	0.5	36.7
TARDLPNQC(+57.02)RLSPQRC(+57.02)E(+14.02)	88.88	2114.01	529.51	-0.6	40.36
FRTTITTVDVDEDIVNQQGRRGE	88.51	2648.32	663.086	0	55.54
GLRQAL(sub V)MQQQGE	87.78	1357.68	679.846	0.1	43.51
GLRQAVM(+15.99)QQQGEM(+15.99)RGEE	85.85	1977.9	660.308	0.5	36.97
GLRQAVMQQQGE	84.48	1343.66	672.838	-0.1	39.37
TARDLPNQCRLSPQRC(+57.02)E	82.34	2042.97	511.75	-0.6	40.88
GLRQAVMQQQ(-18.01)	81.36	1139.59	570.8	-0.9	39.38
ARDLPN(-17.03)QC(+57.02)RLSPQRC(+57.02)E	79.45	1981.92	661.648	1.2	38.05
GLRQAVMQQQ(+.98)	77.18	1158.58	580.298	-0.4	40.23
FRTTITTVDVDED	76.46	1510.72	756.365	-0.4	51.75
L(+43.01)EQC(+57.02)C(+57.02)QQLRQMDE	76.28	1779.73	890.875	0.5	54.76
QAQRQQNLNQC(+57.02)QRYMRQQSQ	75.26	2592.21	649.061	-0.7	36.51
LPNQC(+57.02)RLSPQRC(+57.02)E	74.47	1656.78	553.267	-1.3	37.81
QAQRQQNLNQC(+57.02)Q	74.22	1514.7	758.358	0.6	29.98
LEQC(+57.02)C(+57.02)QQLRQMD(-18.01)	73.1	1589.67	530.899	0.5	41.51
QC(+57.02)C(+57.02)QQLRQMDE	72.47	1494.6	748.308	0.3	37.71
QAQRQQNLNQC(+57.02)QRYMR	72.29	2121.01	531.26	0.9	36.62
Q(-17.03)AQRQQNLNQC(+57.02)QRYMRQQSQYGS	71.82	2882.3	961.777	1.6	40.46
TARDLPNQC(+57.02)R	71.76	1229.59	410.872	0.7	32.2
LEQC(+57.02)C(+57.02)QQLRQMD	70.96	1607.69	804.85	0.5	40.63
FRTTITTVDVDE	70.73	1395.69	698.852	0.3	52.11
QAQRQQNLNQC(+57.02)QR	69.71	1670.8	836.409	0.4	29.84
QC(+57.02)C(+57.02)QQLRQM(+15.99)DE	69.67	1510.6	756.306	0.5	35.02
QAQRQQNLNQC(+57.02)QRYM	68.99	1964.91	655.976	0.7	38.41
G(+43.01)LRQAVM(+15.99)QQQGE	67.96	1402.66	702.339	0.6	42.08
PN(-17.03)QC(+57.02)RLSPQRC(+57.02)E	67.89	1526.67	509.897	-2.5	38.11
TARDLPNQC(+57.02)RLD(sub S)PQRC(+57.02)E	66.49	2127.99	533.005	0	39.11
NLNQC(+57.02)QRYMRQQSQYGSYD	65.61	2438.05	813.691	1.2	42.85
LEQC(+57.02)C(+57.02)QQLRQM(+15.99)DE	65.45	1752.72	877.369	0.6	36.88
GLRQAVMQQ(-.98)	65.31	1028.55	515.285	0	39.5
QAQRQQNLNQC(+57.02)QRYMRQQSQY	65.14	2755.28	689.827	0.6	39.14
Q(-17.03)AQRQQNLNQ	65.1	1209.59	605.8	0.5	32.26
QC(+57.02)C(+57.02)QQLRQM(-48.00)DE	64.91	1446.6	724.307	0.8	30.09
QAQRQQNLNQC(+57.02)QRYM(+15.99)RQQSQYGSYD	64.8	3193.42	799.363	1.6	37.58
NQC(+57.02)RLSPQRC(+57.02)E	64.25	1446.65	724.33	0.1	37.87
Q(-17.03)AQRQQNLNQC(+57.02)QRYMRQQSQYGSYD	64	3160.4	791.107	1.5	47.62
GLRQAVMQQ(-18.01)	63.45	1011.53	506.771	-0.1	39.45
LSPQRC(+57.02)E	61.56	888.412	445.213	-0.4	30.64
TARDLPNQC(+57.02)RLS(-18.01)	61.24	1411.7	471.573	-0.6	37.93
GLRQAVMQQQGE(+21.98)	60.75	1365.64	683.829	-0.1	39.78
QAQRQQNLNQC(+57.02)QRYMRQQSQYGSYD	60.47	3177.42	795.364	1.7	41.1
PNQC(+57.02)RLSPQRC(+57.02)E	60.07	1543.7	772.857	0.6	37.94
C(+57.02)RLSPQRC(+57.02)E	59.09	1204.54	603.279	-0.8	37.88
Q(-17.03)C(+57.02)C(+57.02)QQLRQM(+15.99)DE	59	1493.57	747.792	0	36.78
TARDLPNQ(+.98)C(+57.02)RLS(-18.01)PQRC(+57.02)E	58.94	2082.97	521.749	-0.8	38.35
QAQRQQNLNQC(+57.02)QRYM(+15.99)RQQSQYG	58.8	2828.29	708.081	0.7	36.07
GLRQAVMQQ(+.98)	58.25	1030.52	516.268	-0.6	40.85
ETARDLPNQC(+57.02)RLSPQRC(+57.02)E	57.45	2229.04	558.266	-0.5	38.82
C(+57.02)C(+57.02)QQLRQMDE	57.38	1366.54	684.279	0.3	37.64
QC(+57.02)C(+57.02)QQLRQMD(-18.01)E	57.33	1476.59	739.303	0.9	39.83
QAQRQQNLNQC(+57.02)QRYMRQQSQYGSYD(+37.95)	57.25	3215.37	644.083	3.8	41.07
L(sub M)ETARDLPNQC(+57.02)RLSPQRC(+57.02)E	56.25	2342.12	586.538	-0.2	42.57
QAQRQQNLNQC(+57.02)QRYMRQQSQYGSYDGSN	56.07	3435.52	859.888	1.1	40.44
ITTVDVDEDIVNQQGRRGE	55.94	2143.05	715.358	0.7	50.91
QC(+57.02)RLSPQRC(+57.02)E	55.47	1332.6	667.307	-2.1	38.15
QAQRQQNLNQ(+.98)	55.45	1227.6	614.806	0.7	28.98
LNQC(+57.02)QRYMRQQSQYGSYD	55.35	2324.01	775.677	0.8	40.58
LEQC(+57.02)C(+57.02)QQLRQMDE	55.18	1736.73	869.372	1.4	41.41
TARDLPNQC(+57.02)RLSPQ	55.13	1654.82	552.614	-0.2	38.96
QAQRQQN(+.98)LNQC(+57.02)QRYMRQQSQYG	54.91	2813.28	704.329	0.8	40.69
EGLRQAVMQQQGE	54.37	1472.7	491.908	-0.4	41.67
LEQC(+57.02)C(+57.02)QQLRQMDE(+129.04)R	53.58	2021.87	674.965	0.3	40.8
QAQRQQNLNQC(+57.02)QRYMRQQSQYGS	53.04	2899.33	725.841	1.3	38.42
LEQC(+57.02)C(+57.02)Q(+.98)QLRQMDE	52.26	1737.71	869.863	-0.5	43.13
LEQC(+57.02)C(+57.02)QQLRQ(-18.01)	52.1	1343.61	672.812	1.2	41.54
QAQRQQNLNQ	51.98	1226.61	614.314	1.3	23.77
GLRQAVMQ(+.98)	50.5	902.464	452.24	0.3	40.11
QAQRQQNLNQC(+57.02)QRYMRQQSQYG	50.41	2812.3	704.082	0.2	38.73
QAQRQQNLNQC(+57.02)QRYMRQQ	50.01	2377.12	595.289	1.1	36.64
QNLNQC(+57.02)QRYMRQQSQYGSYD	48.23	2566.11	856.377	1	42.7
EQAQRQQNLNQC(+57.02)QRYMRQQSQYGSYD	48.01	3306.46	827.625	1.7	41.69
RLSPQRC(+57.02)E	47.86	1044.51	523.263	-1.9	30.29
Q(-17.03)C(+57.02)C(+57.02)QQLRQMDE	46.55	1477.57	739.795	0.1	42.12
C(+57.02)QRYMRQQSQYGSYD	46.31	1968.82	657.281	0	37.62
QAQRQQNLNQC(+57.02)QRYMRQQSQYGS(-18.01)	45.1	2881.32	961.449	1.4	41.05
QLRQMDE	45.03	918.423	460.219	-0.2	35.32
AVMQQQGE	43.86	889.396	445.705	-0.4	31.35
LEQC(+57.02)C(+57.02)QQ(-18.01)	42.61	946.364	474.19	0.8	41.57
TARDLPNQ(+.98)	42.57	914.446	458.23	-0.6	35.53
GLRQAVM	40.54	773.422	387.718	-0.7	40.34
IRSARF	39.5	748.434	375.224	-0.7	36.48
MRGEEMRE	37.16	1036.44	519.229	0	31.73
ARDLPNQC(+57.02)RLS(+79.97)PQRC(+57.02)E	35.78	2078.91	520.735	-1.4	34.89
Q(-17.03)QQQQE	35.6	770.319	386.167	0.7	3.61
LRQMDE	35.58	790.364	396.189	-0.2	31.9
A(sub G)LRQAVR(sub M)QQQQ(sub G)E	34.95	1453.77	727.895	0.8	31.83
Butler, GluC Digest 2 [195 spectra & 138 peptides assigned (138 unique) / 76% sequence coverage / -10lgP = 508.37]
TARDLPNQC(+57.02)RLSPQ(+.98)RC(+57.02)E	140.32	2100.98	526.253	2.3	27.36
G(+27.99)LRQAVMQQQGE	131.83	1371.66	686.834	-1.7	35.97
G(+43.01)LRQAVMQQQ(+.98)GE	128.81	1387.65	694.833	0.2	38.17
TARDLPNQC(+57.02)R(+.98)LSPQRC(+57.02)E	121.29	2100.98	526.252	-0.8	28.42
TARDLPNQC(+57.02)RLSPQRC(+57.02)E	118.5	2100	526.005	-1.9	26.19
Q(+43.01)AQRQQNLNQC(+57.02)QRYM	117.5	2007.91	670.311	-1	30.05
TARDLPN(+.98)QC(+57.02)RLSPQRC(+57.02)E	115.3	2100.98	701.334	0	28.43
TARDLPNQC(+57.02)RLSPQRC(+57.02)E(+14.02)	115.17	2114.01	529.509	-2.8	29.56
G(+43.01)LRQAVMQQQGE	114.06	1386.67	694.34	-1.3	36.21
Q(-17.03)AQRQQNLNQC(+57.02)QRYMRQQSQYG	112.9	2795.27	932.765	0.3	32.39
Q(-17.03)AQRQQNLNQC(+57.02)QRYM	109.81	1947.88	650.3	-0.6	30.55
T(+27.99)ARDLPNQC(+57.02)RLSPQRC(+57.02)E	109.72	2127.99	710.337	-1.2	32.68
GLRQAVMQQQGEM(+15.99)RGEE	107.4	1961.9	654.975	-0.4	27.8
TARDLPNQCRLSPQRC(+57.02)E	106.08	2042.97	511.75	-2.4	30.12
G(+43.01)LRQAVM(+15.99)QQQGE	104.81	1402.66	702.338	0	32.73
GLRQAVMQQQGEM(+15.99)RGEEM(+15.99)RE	104.49	2394.08	599.528	-1.1	27.08
TP(sub A)RDLPNQC(+57.02)RLSPQRC(+57.02)E	104.3	2126.01	532.509	-2.5	28.75
Q(-17.03)AQRQQNLNQC(+57.02)QRYMRQQSQY	102.54	2738.25	913.757	-0.4	32.63
Q(-17.03)AQRQQNLNQC(+57.02)QR	101.88	1653.78	827.894	-0.7	14.95
Q(-17.03)AQRQQNLNQC(+57.02)QRY	101.49	1816.84	909.426	-0.8	25.18
Q(-17.03)C(+57.02)C(+57.02)QQLRQMDE	100.94	1477.57	739.794	-1.5	30.28
GLRQAVM(+15.99)QQQGEM(+15.99)RGEE	99.6	1977.9	660.307	-0.5	24.97
GLRQAVMQQQGEM(-48.00)RGEE	98.83	1897.91	633.642	-1	25.68
GLRQAVM(+15.99)QQQGE	97.66	1359.66	680.835	-1.4	24.29
GLRQAVM(+15.99)QQQGEM(+15.99)RGEEM(+15.99)RE	97.64	2410.08	603.527	-0.2	24.87
TARDLPNQC(+57.02)RLSPQRC(+57.02)	95.18	1970.95	493.745	-1.3	26.13
QAQRQQNLNQC(+57.02)QRYMRQ(+.98)	93.28	2250.05	563.519	-1.8	25.59
LEQC(+57.02)C(+57.02)Q(+.98)QLRQMDE	93.19	1737.71	869.865	2	33.95
T(+43.01)ARDLPNQC(+57.02)RLSPQRC(+57.02)E	92.94	2143	715.34	-0.8	32.62
GLRQAVMQQ(+.98)QGE	91.21	1344.65	673.33	-0.9	29.93
GLRQAVMQQQGE	89.15	1343.66	672.837	-1.6	27.88
L(+43.01)EQC(+57.02)C(+57.02)QQLRQMDE	87.39	1779.73	890.874	-0.1	47.11
QAQRQQNLNQC(+57.02)QRYM(+15.99)RQ(+.98)	86.11	2266.04	567.518	-1.5	19.29
TARDLPNQC(+57.02)RLSPQRCE	85.6	2042.97	681.998	-0.3	28.53
FRTTITTVDVDEDIVNQQGRRGE	85.29	2648.32	663.086	-0.9	47.79
QAQRQQNLNQC(+57.02)QRYMRQQSQ(+.98)	85.09	2593.2	649.307	-0.2	25.03
LEQC(+57.02)C(+57.02)QQLRQMD	83.63	1607.69	804.85	-0.5	29.64
EGLRQAVMQQQGE	81.78	1472.7	737.359	-0.8	32.64
Q(-17.03)AQRQQNLNQC(+57.02)Q	81.76	1497.67	749.843	-1.8	16.54
QC(+57.02)C(+57.02)QQLRQMD(-18.01)	81.18	1347.55	674.781	-0.3	25.79
LPNQC(+57.02)RLSPQRC(+57.02)E	80.89	1656.78	829.398	-1	26.21
QAQRQQNLNQC(+57.02)QRYMRQQSQ	80.61	2592.21	649.06	-1.1	24.57
GLRQAL(sub V)MQQQGE	79.72	1357.68	679.846	-0.6	33.54
GLRQAVM(-48.00)QQQGE	78.87	1295.66	648.837	0.5	17.31
QAQRQQNLNQC(+57.02)QRYMRQQSQYGSYD	78.87	3177.42	795.362	-0.7	32.34
GLRQAVMQQQ(+.98)	78.6	1158.58	580.297	-1.5	28.84
QAQRQQNLNQC(+57.02)Q	78.12	1514.7	758.358	0	7.93
LEQC(+57.02)C(+57.02)QQLRQ(+.98)MDE	77.99	1737.71	869.863	0.1	33.28
GLRQAVMQQQ(-18.01)	77.34	1139.59	570.8	-1.7	27.89
MRQQSQYGSYD	76.92	1361.57	681.79	-1.3	21.25
QAQRQQNLNQC(+57.02)QRYM(-48.00)RQQSQYG	76.4	2764.3	692.082	0.2	20.52
GLRQAVMQQQGEMRGEE	76.3	1945.91	649.643	-0.8	34.08
QC(+57.02)C(+57.02)QQLRQM(-48.00)DE	76.02	1446.6	724.306	-0.9	7.86
QC(+57.02)C(+57.02)QQLRQMDE	75.17	1494.6	748.308	-0.4	25.91
TARDLPNQC(+57.02)R	74.65	1229.59	410.871	-1.3	12.63
QC(+57.02)C(+57.02)QQLRQM(+15.99)DE	74.17	1510.6	756.306	0.1	15.5
QAQRQQNLNQC(+57.02)QRYMRQ	73.52	2249.07	563.273	-1.3	24.67
QAQRQQNLNQC(+57.02)QRYMR	72.86	2121.01	531.258	-2	24.52
FRTTITTVDVDED	72.6	1510.72	756.363	-2.8	40.33
Q(-17.03)AQRQQNLNQC(+57.02)QRYMRQQSQ	72.21	2575.19	859.403	-0.1	26.66
QAQRQQNLNQC(+57.02)QRYMRQQSQYGSYDGSN	71.92	3435.52	859.886	-0.4	29.85
PNQC(+57.02)RLSPQRC(+57.02)E	71.12	1543.7	772.855	-1.7	26.28
FRTTITTVDVDE	71.07	1395.69	698.851	-0.4	40.97
LEQC(+57.02)C(+57.02)QQLRQM(+15.99)DE	70.98	1752.72	877.369	0.3	24.7
TARDLPNQC(+57.02)RLS(-18.01)	70.78	1411.7	471.572	-2.7	26.29
NQC(+57.02)RLSPQRC(+57.02)E	70.55	1446.65	724.33	-0.9	26.71
QAQRQQNLNQC(+57.02)QRYMRQQSQYGSYD(+37.95)	69.35	3215.37	644.08	-1.9	30.49
QAQRQQNLNQC(+57.02)QRYM(+15.99)RQQSQYGSYD	69.33	3193.42	799.362	1	26
QAQRQQNLNQC(+57.02)QR	68.9	1670.8	836.408	0.1	7.73
TARDLPNQC(+57.02)RLSPQRC(+57.02)EI	68.41	2213.08	554.277	-0.6	34.21
LNQC(+57.02)QRYMRQQSQYGSYD	68.15	2324.01	775.676	-0.4	29.92
QC(+57.02)C(+57.02)QQLRQ(+.98)	67.77	1120.48	561.244	-1.8	14.13
NLNQC(+57.02)QRYMRQQSQYGSYD	67.68	2438.05	813.691	0.3	32.99
ARDLPN(-17.03)QC(+57.02)RLSPQRC(+57.02)E	67.54	1981.92	661.646	-2.9	26.51
QAQRQQNLNQC(+57.02)QRYMRQQSQYG	67.33	2812.3	704.082	0	27.47
QAQRQQNLNQC(+57.02)QRY	66.26	1833.87	917.94	-0.3	20.7
LEQC(+57.02)C(+57.02)QQLRQMDE	65.84	1736.73	869.371	-0.4	32.48
RDLPNQC(+57.02)RLSPQRC(+57.02)E	65.68	1927.91	643.641	-4.9	26.48
QAQRQQNLNQC(+57.02)QRYM	65.45	1964.91	655.975	-0.7	26.61
Q(+43.01)AQRQQNLNQC(+57.02)QRYMRQQSQYG	64.34	2855.31	952.776	0.5	30.34
TARDLPNQC(+57.02)RLSPQ(+.98)	63.98	1655.8	552.942	-1.1	28.79
QAQRQQNLNQC(+57.02)QRYM(+15.99)RQQSQYG	63.78	2828.29	708.081	0.2	24.12
QQSQYGSYD	63.4	1074.43	538.219	-1.5	19
M(+15.99)RQQSQYGSYD	63.35	1377.56	689.788	-0.3	17.67
C(+57.02)RLSPQRC(+57.02)E	62.75	1204.54	402.521	-1.9	14.9
TVDVDEDIVNQQGRRGE	62.71	1928.92	643.98	-0.7	33.87
Q(-17.03)AQRQQNLNQ	62.65	1209.59	605.799	-1	12.57
GLRQAVMQQQGE(+14.02)	62.37	1357.68	679.846	0.6	32.96
RQQSQYGSYD	62.32	1230.53	616.269	-1.6	16.64
QAQRQQNLNQC(+57.02)QRYM(+15.99)R	62.12	2137	535.257	-1.6	17.49
QAQRQQN(-17.03)LNQC(+57.02)QRYMRQQ	61.84	2360.1	787.706	-0.6	26.88
Q(-17.03)AQRQQNLNQC(+57.02)QRYMRQQSQYGS	61.7	2882.3	961.776	0.5	29.84
TARDLPNQC(+57.02)RLD(sub S)PQRC(+57.02)E	61.54	2127.99	533.004	-1.5	27.83
ETARDLPNQC(+57.02)RLSPQRC(+57.02)E	60.46	2229.04	558.266	-1.4	27.54
GLRQAVMQQQGE(+21.98)	59.85	1365.64	683.828	-1.4	28.37
GLRQAVMQQ(-.98)	59.28	1028.55	515.284	-1.3	28
Q(-17.03)C(+57.02)C(+57.02)QQLRQM(+15.99)DE	59.23	1493.57	747.792	-0.8	24.54
QAQRQQNLNQC(+57.02)QRYMRQQSQYGS	59.08	2899.33	725.84	0	26.98
YMRQQSQYGSYD	59.07	1524.63	763.323	0.9	25.33
PN(-17.03)QC(+57.02)RLSPQRC(+57.02)E	59.02	1526.67	764.343	-0.7	26.4
GLRQAVMQQ(-18.01)	58.41	1011.53	506.77	-2.4	27.92
RLSPQRC(+57.02)E	56.47	1044.51	523.263	-1.7	8.2
QC(+57.02)C(+57.02)QQLR	55.28	991.433	496.723	-1.6	8.3
LSPQRC(+57.02)E	54.84	888.412	445.213	-2	9.36
QAQRQQNLNQC(+57.02)QRYMRQQSQY	54.7	2755.28	689.826	-1.6	28.06
QNLNQC(+57.02)QRYMRQQSQYGSYD	54.05	2566.11	856.377	0.5	32.89
QC(+57.02)RLSPQRC(+57.02)E	52.25	1332.6	667.306	-4.2	26.54
AQRQQNLNQC(+57.02)QRYMRQQSQYG	52.1	2684.24	895.755	1.5	27.67
RYMRQQSQYGSYD	51.87	1680.73	561.25	-2.3	24.49
LEQC(+57.02)C(+57.02)QQLRQM(-48.00)DE	51.29	1688.72	563.915	-1	20.59
C(+57.02)QRYMRQQSQYGSYD	50.58	1968.82	657.28	-0.5	25.83
GLRQAVMQQQGEL(sub M)E(sub R)	50.19	1585.79	793.9	-1.1	37.02
QC(+57.02)C(+57.02)QQLRQMD	49.08	1365.56	683.787	0.1	24.71
QAVMQQQGE	48.76	1017.46	509.734	-1.9	15.04
MRGEEMRE	48.38	1036.44	519.228	-2.1	11.75
GLRQ(+.98)AVMQQQGE	47.2	1344.65	449.222	-0.4	29.38
IRSARF	47	748.434	375.224	-1.3	20.91
AVMQQQGE	46.11	889.396	445.704	-2.6	11.85
DLPNQC(+57.02)RLSPQRC(+57.02)E	45.89	1771.81	591.61	-1	28.2
QQNLNQC(+57.02)QRYMRQQSQYGSYD	45.54	2694.17	674.549	-0.3	33.06
QAQRQQNLNQC(+57.02)QRYM(+15.99)	45.19	1980.9	661.307	-0.7	19.65
TARDLPN(-17.03)QC(+57.02)R	43.88	1212.57	405.196	-1.3	12.64
TARDLPNQC(+57.02)RLSPQRC(+57.02)E(+129.04)I	43.29	2342.12	586.538	0	33.47
C(+57.02)QQLRQMDE	42.06	1206.51	604.263	-0.4	24.17
GLRQAVMQQQGE(+57.02)MRGEE	41.99	2002.93	501.739	-2	25.66
QC(+57.02)C(+57.02)QQLRQMDE(+129.04)R	41.84	1779.75	594.255	-1.5	25.31
QAQRQQNLNQ	41.39	1226.61	614.313	-0.4	5.59
C(+57.02)C(+57.02)QQLRQMDE	40.11	1366.54	684.278	-0.6	25.46
QSQYGSYD	38.4	946.367	474.19	-2	18.32
TP(sub A)RE(sub D)LPNQC(+57.02)RLSPQRC(+57.02)E	38.39	2140.03	536.013	-1.2	30.15
QAQRQQNLNQC(+57.02)QRYMRQQS(+77.99)	37.87	2542.14	636.545	3.4	30.1
QLRQMDE	37.11	918.423	460.218	-1.8	17.36
ELEQC(+57.02)C(+57.02)QQLRQMD(-18.01)	35.7	1718.72	860.366	0.3	46.75
QAQRQQNLNQCQRYME(sub R)QQSQY	35.51	2671.2	668.807	-0.4	30.37
LEQC(+57.02)C(+57.02)QQ	35.36	964.374	483.194	-0.8	5.91
N(-17.03)QC(+57.02)RLSPQRC(+57.02)E	35.19	1429.62	715.816	-1.7	26.39
TARDLPN(-18.01)	35.15	767.393	384.703	-2	26.44
T(+79.97)ARDLPNQC(+57.02)RLSPQRC(+57.02)E	34.79	2179.96	545.996	-2.6	16.38
Webb's Prize Nut, Tryptic Digest 1 [76 spectra & 61 peptides assigned (61 unique) / 58% sequence coverage / -10lgP = 494.15]
Q(+43.01)AVMQQQGEMR	152.51	1347.6	674.811	3.2	31.15
Q(+43.01)AVMQQQGEMRGEEMR	150.57	1949.85	650.958	1.3	36.81
Q(-17.03)AVMQQQGEM(+15.99)RGEEMR	148.34	1905.81	636.281	3.7	31.77
Q(-17.03)QQQQELEQC(+57.02)C(+57.02)QQLR	144.31	1985.87	662.965	2.5	37.95
Q(-17.03)QQQELEQC(+57.02)C(+57.02)QQLR	133.39	1857.81	929.917	4.7	37.28
Q(+43.01)QNLNQC(+57.02)QR	129.61	1230.55	616.285	2.2	11.87
Q(-17.03)QQELEQC(+57.02)C(+57.02)QQLR	127.86	1729.75	865.886	3.3	39.81
Q(-17.03)AVMQQQGEMRGEEMR	126.33	1889.82	630.948	2.1	37.12
Q(-17.03)QELEQC(+57.02)C(+57.02)QQLR	124.38	1601.69	801.856	2.4	38.35
G(+43.01)EEMREVMETAR	118.88	1479.64	740.832	3	47.37
H(sub Q)QQQELEQC(+57.02)C(+57.02)QQLR	116.86	1883.84	628.954	2.3	28.45
QQQQQE(+37.03)LEQC(+57.02)C(+57.02)QQLR	113.98	2039.93	680.983	0.8	32.17
Q(-17.03)AVMQQQGEMR	111.68	1287.57	644.793	1.4	32.55
QAVMQQQGEM(-48.00)RGEEMR	101.54	1858.84	620.622	2.2	19.05
QAVM(+15.99)QQQGEMRGEEMR	99.82	1922.84	641.955	1.7	24.45
QAVM(+15.99)QQQGEMRGEEMREVMETAR	98.54	2739.22	685.814	2.2	42.84
E(+43.01)VMETAR	98.46	877.396	439.707	2.3	26.94
QAVMQQQGEMR	94.84	1304.6	653.307	1.9	23.51
QAVMQQQGEMRGEEMREVMETAR	93.46	2723.22	681.814	1.3	47.25
D(+43.01)LPNQC(+57.02)R	90.96	944.413	473.215	1.7	19.69
QAVMQQQGEMRGEEMREVM(+15.99)ETAR	89.38	2739.22	685.814	2.1	39.49
QAVM(+15.99)QQQGEM(+15.99)R	88.79	1336.59	669.3	-0.5	3.05
GEEMREVMETAR	87.38	1436.64	479.887	1.4	34.62
QAVMQQQ(-18.01)	83.6	813.38	407.698	2.1	23.65
Q(-17.03)QNLNQC(+57.02)QR	82.96	1170.52	586.269	2.1	13.6
GEEM(-48.00)REVMETAR	81.63	1388.64	463.886	0.9	9.15
QAVM(+15.99)QQQGEM(+15.99)RGEEMREVMETAR	81.25	2755.21	689.813	2.9	39.33
QAVM(+15.99)QQQGEMR	80.8	1320.59	661.303	0.8	11.15
QN(sub A)VMQQQGEMRGEEMREVMETAR	79.35	2766.23	923.087	3	54.53
QAVM(+15.99)QQQGEM(+15.99)RGEEMR	79.25	1938.83	647.287	3	16.8
QQNLNQCQR	78.06	1130.53	566.271	1.6	8.7
E(-18.01)VMETAR	76.64	816.38	409.198	1.8	9.63
Q(+43.01)MDER	75.24	720.286	361.151	1.6	5.09
Q(-17.03)QSQYGSYD	75.19	1057.4	529.707	0.7	24.12
MREVMETAR	74.64	1121.53	561.774	2	34.71
EMREVMETAR	71.27	1250.57	626.296	2.3	34.65
GEEMREVM(+15.99)ETAR	70.76	1452.63	485.219	1	24.97
DLPNQCR	68.91	844.386	423.201	1.8	16.2
GEEM(+15.99)REVMETAR	67	1452.63	485.219	2	22.73
QQSQYGSY(-18.01)D	65.84	1056.41	529.216	1.6	18.03
DLPNQC(+57.02)R	65.67	901.408	451.712	1.3	8.95
QAVMQQQGEMRGEEM(+15.99)REVMETAR	65.44	2739.22	685.814	3.1	37.46
QQQQELEQC(+57.02)C(+57.02)QQLR	62.73	1874.84	625.955	4.3	31.81
EVMETAR	60.36	834.391	418.204	3.7	27.07
DLPN(-17.03)QC(+57.02)R	59.77	884.381	443.199	2.5	8.89
LEQC(+57.02)C(+57.02)QQLR	58.38	1233.56	617.788	2.4	35.09
QAVMQQ(-18.01)	58.2	685.322	343.669	1.7	23.68
QQNLNQC(+57.02)QR	57.91	1187.55	594.782	1.7	4.79
C(+57.02)RC(+57.02)EGLR	56.58	949.422	317.482	2.3	4.69
MQQQGEMRGEEMR	55.57	1608.68	805.35	3.3	30.41
G(+87.03)ESC(+57.02)REQAQR	55.56	1306.57	654.292	1.2	1.72
VMQQQGEMRGEEMR	55.21	1707.75	854.885	3.4	30.45
LPNQC(+57.02)R	53.95	786.381	394.199	3.2	19.83
QQQGEMRGEEMR	52.55	1477.64	739.83	3	30.43
PNQCR	51.67	616.275	309.145	0.9	16.23
QNLNQC(+57.02)QR	49.25	1059.49	530.753	2.9	12.07
QQSQYGS(-18.01)	48.76	778.325	390.171	2.4	17.98
QQQQE(+61.91)LEQC(+57.02)C(+57.02)QQLR	45.72	1936.75	485.194	-1	28.5
E(+57.02)MRGEEMR	45.67	1093.46	547.74	1.4	30.58
VMETAR	45.62	705.348	353.682	2.1	9.74
MQQQGEMR	44.84	1006.43	504.224	1.4	32.19
Webb's Prize Nut, Tryptic Digest 2 [134 spectra & 83 peptides assigned (83 unique) / 80% sequence coverage / -10lgP = 446.50]
Q(-17.03)AVMQQQGEMR	130.58	1287.57	644.792	-1	28.88
H(sub Q)QQQELEQC(+57.02)C(+57.02)QQLR	126.74	1883.84	942.926	-0.1	20.62
Q(+43.01)AVMQQQGEMR	124.04	1347.6	674.808	-1.2	24.31
Q(-17.03)QQQELEQC(+57.02)C(+57.02)QQLR	107.83	1857.81	620.277	-0.9	40.08
Q(-17.03)QQELEQC(+57.02)C(+57.02)QQLR	107.04	1729.75	577.59	-1.4	41.74
QAVMQQQGEMR(+14.02)	105.83	1318.61	660.313	-1.2	23.23
Q(-17.03)QQQQELEQC(+57.02)C(+57.02)QQLR	105.21	1985.87	662.962	-2	41.04
Q(-17.03)AVMQQQGEMRGEEM(+15.99)R	104.71	1905.81	953.913	-0.4	22.51
QAVMQQQGE(+14.02)MRGEEMR	104.7	1920.86	641.294	-0.4	30.56
QAL(sub V)MQQQGEMR	104.07	1318.61	660.313	-0.9	21.28
QQH(sub Q)QELEQC(+57.02)C(+57.02)QQLR	98.33	1883.84	628.952	-1	20.62
Q(-17.03)QELEQC(+57.02)C(+57.02)QQLR	95	1601.69	801.854	-0.2	40.77
Q(-17.03)AVMQ(+.98)QQGEMR	94.95	1288.55	645.283	-1.7	31.42
G(+43.01)EEMREVMETAR	94.84	1479.64	740.829	-0.8	48.66
Q(-17.03)AVMQQQGEMRGEEM(+15.99)REVMETAR	91.34	2722.19	908.405	-0.2	44.3
TTITTVDVDEDIVNQQGR	91.15	2002.98	668.668	0	53.73
Q(+43.01)AVMQQQGEMRGEEMR	90.72	1949.85	650.957	-1.5	39.88
E(-18.01)LEQC(+57.02)C(+57.02)QQLR	89.89	1344.59	673.302	-1.2	35.72
Q(-17.03)AVMQQ(+.98)QGEMR	89.76	1288.55	645.284	0.2	32.14
QAVMQQQGEMR	88.56	1304.6	653.304	-1.7	20.34
Q(+380.15)QQELEQC(+57.02)C(+57.02)QQLR	86.86	2126.92	709.981	-1.9	21.77
Q(-17.03)ELEQC(+57.02)C(+57.02)QQLR	85.82	1473.63	737.824	-0.7	39.26
GEEMREVMETAR	80.87	1436.64	719.326	-0.4	32.24
QAVM(+15.99)QQQGEM(+15.99)R	80.6	1336.59	669.3	-0.8	15.74
Q(-17.03)AVMQQQGEMR(+14.02)	79.97	1301.59	651.799	-2.1	41.26
ITTVDVDEDIVNQQGR	79.29	1800.89	901.45	0	47.32
GEEM(+15.99)REVMETAR	79.12	1452.63	727.323	-1.2	20.17
NQ(+.98)QQQQELEQC(+57.02)C(+57.02)QQLR	78.61	2117.92	706.984	3.4	33.46
Q(+.98)QQQQELEQC(+57.02)C(+57.02)QQLR	78.41	2003.88	668.966	-1.5	30.89
Q(+134.05)QQQELEQC(+57.02)C(+57.02)QQLR	77.92	2008.88	670.635	-0.1	40.31
Q(-17.03)AVMQQQGEMRGEEMR	77.71	1889.82	945.917	0.8	39.98
QAVMQQQGEMRGEEM(+15.99)REVMETAR	76.56	2739.22	685.812	-0.8	40.09
QQ(+192.06)QQELEQC(+57.02)C(+57.02)QQLR	76.16	2066.9	689.971	-4.5	34.38
QQQQQE(+37.03)LEQC(+57.02)C(+57.02)QQLR	75.4	2039.93	680.982	-1.3	21.65
QAVMQQQGEM(+15.99)RGEEM(+15.99)REVMETAR	75.09	2755.21	689.81	-0.9	21.44
E(+43.01)VMETAR	74.39	877.396	439.705	-2	22.11
QAVMQQQGEM(+15.99)RGEEMR	72.33	1922.84	641.953	-1.4	20.14
D(+43.01)LPNQC(+57.02)R	71.58	944.413	473.213	-1.7	20.41
QELEQC(+57.02)C(+57.02)QQLR	69	1490.66	746.337	-0.6	40.58
RGESC(+57.02)S(sub R)EQAQR	68.02	1306.57	654.291	-0.7	1.61
LEQC(+57.02)C(+57.02)QQLR	64.18	1233.56	617.785	-3.5	32.92
Q(+380.15)QELEQC(+57.02)C(+57.02)QQLR	63.28	1998.87	1000.44	-2.9	21.52
DLPNQC(+57.02)R	63.19	901.408	451.71	-2.6	20
GESC(+57.02)S(sub R)EQAQR	61.79	1150.47	576.24	-1	9.94
Q(+.98)QQQELEQC(+57.02)C(+57.02)QQLR	60.66	1875.82	938.915	-2.9	22.71
E(-18.01)VM(+15.99)ETAR	58.75	832.375	417.194	-2.2	11.61
VMQQQGEMR	58.26	1105.5	553.756	-2.2	28.2
QAVMQQQGEMRGEEMR	57.95	1906.84	954.429	-0.2	21.02
Q(-17.03)QSQYGSYD	57.92	1057.4	529.706	-1.4	20.86
VMQQQGEMRGEEMR	57.9	1707.75	854.881	-0.9	21.08
QQQELEQC(+57.02)C(+57.02)QQLR	57.39	1746.78	874.397	0.6	40.6
QC(+57.02)C(+57.02)QQLR	57.34	991.433	496.723	-2.4	32.77
SYDGST(sub N)QQQQQELEQC(+57.02)C(+57.02)QQLR	56.2	2613.12	872.044	-3.6	41.9
RQQNLNQC(+57.02)QR	55.75	1343.65	672.831	-0.7	15.87
Q(+43.01)MDER	55.09	720.286	361.15	-1.4	15.55
EVMETAR	54.99	834.391	418.202	-2.2	20.02
C(+57.02)C(+57.02)QQLR	54.66	863.374	432.694	-1.2	32.87
QQNLNQC(+57.02)QR	53.99	1187.55	594.78	-1.5	19.91
RGESC(+57.02)R	53.7	763.34	382.676	-1.2	1.62
QQQQQEP(sub L)EQC(+57.02)C(+57.02)QQLR	53.11	1986.86	994.435	-4.1	42.55
E(-18.01)VMETAR	52.28	816.38	409.197	-1.6	20.06
MREVMETAR	52.11	1121.53	561.773	-1.2	32.38
C(+57.02)RC(+57.02)EGLR	51.99	949.422	317.481	-1.4	16.99
EVM(+15.99)ETAR	51.42	850.385	426.199	-1.8	12.24
S(sub G)SNQQQQQELEQC(+57.02)C(+57.02)QQLR	51.1	2291	764.677	2.8	54.73
Q(-17.03)AVMQQQGEM(+15.99)RGEEMR	49.56	1905.81	953.914	-0.1	21.89
QQQGEMR	49.12	875.392	438.702	-2	28.12
MQQQGEMR	48.66	1006.43	504.223	-1.4	28.56
QMDER	48.04	677.28	339.647	-0.2	6.14
QQGEMRGEEMR	47.58	1349.58	675.797	-1	40.03
MQQQGEMRGEEMR	47.23	1608.68	805.347	-0.8	21.02
EMREVMETAR	45.11	1250.57	626.295	0.7	32.1
QQQGEMRGEEMR	44.2	1477.64	739.827	-0.4	40
GEEMR	43.07	620.259	311.136	-1.2	7.75
C(+57.02)EGLR	42.85	633.29	317.652	-1	14.99
Q(+43.01)QSQYGSYD	40.57	1117.43	559.722	-1.2	20.74
QQSQYGSYD	40.15	1074.43	538.219	-2.4	20.25
EQC(+57.02)C(+57.02)QQLR	38.93	1120.48	561.244	-0.9	32.97
LSPQR	38.78	599.339	300.676	-1.2	13.75
METAR	38.77	606.279	304.147	-1.7	20.07
VM(+15.99)ETAR	38.77	721.343	361.678	-0.9	12.01
C(+57.02)EIRS	35.14	663.301	332.658	0	15.59
RC(+57.02)EGLR	34.24	789.391	395.703	-1.2	16.3
Webb's Prize Nut, GluC Digest 1 [92 spectra & 61 peptides assigned (61 unique) / 68% sequence coverage / -10lgP = 398.62]
Q(-17.03)AQRQQNLNQC(+57.02)QRYMRQQSQYG	117.98	2795.27	932.766	1.3	33.44
TARDLPNQC(+57.02)RLSPQRC(+57.02)E	117.65	2100	526.006	0.2	28.61
Q(-17.03)AQRQQNLNQC(+57.02)QRYM	104.53	1947.88	974.949	1.9	33.05
TARDLPNQC(+57.02)RLSPQRC(+57.02)	97.77	1970.95	493.746	0.4	28.06
Q(-17.03)AQRQQNLNQC(+57.02)QRYMRQQSQ	89.95	2575.19	644.805	0.5	28.81
T(+43.01)ARDLPNQC(+57.02)RLSPQRC(+57.02)E	87.69	2143	715.341	0.6	33.7
GLRQAVMQQQGEM(+15.99)RGEEMRE	84.02	2378.09	595.529	-0.1	33.54
GLRQAVMQQQGEMRGEEM(+15.99)RE	83.92	2378.09	595.53	0.5	36.5
GLRQAVMQQQGEMRGEEMRE	83.55	2362.09	591.53	-0.6	40.45
Q(-17.03)AQRQQNLNQC(+57.02)QRYMRQQSQYGSYD	77.78	3160.4	1054.47	1.1	36.46
QAQRQQNLNQC(+57.02)QRYMRQQSQYGSYD	77.01	3177.42	795.363	0.5	33.42
MRQQSQYGSYD	75.01	1361.57	681.792	1.7	20.33
Q(-17.03)AQRQQNLNQC(+57.02)QRYMRQQSQY	74.25	2738.25	913.759	1.5	33.97
QAQRQQNLNQC(+57.02)QRYM(+15.99)RQQSQYGSYD	73.85	3193.42	799.363	1.6	28.09
Q(-17.03)AQRQQNLNQC(+57.02)QRYMRQQSQYGS	73.63	2882.3	961.778	2.3	32.62
GLRQAVMQQQGEMRGEEMREVME	71.71	2721.25	681.319	1.1	49.14
TARDLPNQC(+57.02)R	71	1229.59	410.873	2.1	9.26
Q(+43.01)C(+57.02)C(+57.02)QQLRQMDE	70.83	1537.61	769.812	0.8	32.99
RC(+57.02)RC(+57.02)EGLRQAVMQQQGEMRGEEMREVME	70.72	3482.55	697.515	-3.7	46.95
QC(+57.02)C(+57.02)QQLRQMDE	69.05	1494.6	748.308	0.8	26.54
GLRQAVMQQQGEMRGE(+129.04)	67.99	1945.91	973.962	0.2	37.09
QAQRQQNLNQC(+57.02)QRYM(-48.00)RQQSQ	67.35	2544.21	637.059	-1.9	6.59
QAQRQQNLNQC(+57.02)QRYMRQQS	66.83	2464.16	617.047	1.5	25.12
SC(+57.02)REQAQRQQNLNQC(+57.02)QRYMRQQSQYGSYD	64.01	3709.63	928.415	0.6	32.95
RQQSQYGSYD	60.11	1230.53	616.271	0.8	13.67
MREVMETARDLPNQC(+57.02)RLSPQRC(+57.02)EIRS	59.97	3231.55	647.317	-0.3	41.52
AVMQQQGEMRGEEMRE	59.93	1907.83	636.951	0.9	30.52
TARDLPNQC(+57.02)RLSPQRC(+57.02)EIRS	58.57	2456.21	492.25	-0.4	31.67
QAQRQQNLNQC(+57.02)QRY	55.99	1833.87	612.296	1.2	19.76
YMRQQSQYGSYD	55.79	1524.63	763.323	1.2	25.88
VMETARDLPNQC(+57.02)RLSPQRC(+57.02)E	55.43	2459.15	820.725	2	35.91
QAQRQQNLNQC(+57.02)QRYMRQ	55.41	2249.07	563.274	1	25.15
GR(sub L)RQAVMQQQGEMRGEEMREVME	55.13	2764.26	922.426	-2.8	57.11
GLRQN(sub A)VMQQQGEMRGEE	54.36	1988.92	663.979	0.1	46.43
VMETARDLPNQC(+57.02)RLSPQRC(+57.02)EIRS	53.18	2815.36	564.08	0	37.85
QAQRQQNLNQC(+57.02)QRYM	53.18	1964.91	983.462	1.9	28.73
ETARDLPNQC(+57.02)RLSPQRC(+57.02)E	52.89	2229.04	744.02	0.7	35.96
TARDLPNQC(+57.02)RLSPQRC(+57.02)EIRSA	52.03	2527.25	506.457	-1.2	32.84
QAQRQQNLNQC(+57.02)QRYMRQQSQYGS	51.09	2899.33	725.841	1.2	29.38
RYMRQQSQYGSYD	50.8	1680.73	561.251	0.1	24.06
PNQC(+57.02)RLSPQRC(+57.02)E	50.67	1543.7	515.573	-0.1	28.7
GR(sub L)RQAVMQQQGEMRGEEMRE	49.61	2405.11	802.708	-3.7	48.5
VM(+15.99)ETARDLPNQC(+57.02)RLSPQRC(+57.02)E	49.07	2475.14	619.793	1.3	32.68
LEQC(+57.02)C(+57.02)QQLRQMDE	48.54	1736.73	869.373	1.5	33.37
TARDLPNQC(+57.02)RLSPQRC(+57.02)EIRSAR	46.67	2683.35	448.232	-0.1	30
QAQRQQNLNQC(+57.02)QRYMRQQSQYG	46.67	2812.3	938.443	2.5	30.2
METARDLPNQC(+57.02)RLSPQRC(+57.02)E	46.2	2360.08	787.701	1.7	35.94
TP(sub A)RDLPNQC(+57.02)RLSPQRC(+57.02)EIRS	46.02	2482.23	497.452	-1.5	33.89
QAQRQQNLNQC(+57.02)Q	45.74	1514.7	758.357	-1	4.44
NQC(+57.02)RLSPQRC(+57.02)E	45.59	1446.65	724.331	1.2	28.88
QAQRQQNLNQC(+57.02)QR	45.41	1670.8	557.942	0.5	3.49
QQQGEMRGEEMRE	44.49	1606.68	536.569	1.3	19.55
VMETARDLPNQC(+57.02)RLSPQRC(+57.02)	44.35	2330.1	583.533	-0.2	35.56
Q(-17.03)AQRQQNLNQC(+57.02)QRYMRQQ	42.82	2360.1	787.708	1.5	29.04
MRGEEMREVME	42.45	1395.59	698.805	0.5	32.97
LEQC(+57.02)C(+57.02)QQLRQM(+15.99)DE	42.26	1752.72	585.249	1.3	24.78
QAQRQQNLNQC(+57.02)QRYMRQQ	41.99	2377.12	793.383	1.9	25.04
RC(+57.02)RC(+57.02)EGLRQAVM	41.45	1534.73	512.583	0.1	29.14
TARDLPD(sub N)QC(+57.02)RLSPQRC(+57.02)EIRS	40.73	2457.2	492.445	-2.2	33.86
RC(+57.02)RC(+57.02)EGLRQAVMQ(-18.01)	39.09	1644.78	549.264	-3.6	38.99
MREVME	38.51	793.346	397.681	0.4	21.29
TARDLPNQC(+57.02)RLS(-18.01)	38.21	1411.7	706.858	1.8	29.77
QAQRQQNLNQC(+57.02)QRYMRQQSQY	37.94	2755.28	919.434	0.9	30.65
TARDLPNQC(+57.02)RLSPQ	37.16	1654.82	552.615	0.5	29.7
MRGEEMRE	34.1	1036.44	346.488	0.3	8.23
M(+43.01)REVME	33.6	836.352	419.183	-0.1	36.99
RC(+57.02)RC(+57.02)EGLR	32.5	1105.52	369.515	-0.3	2.81
QAQRQQNLNQC(+57.02)QRYMRQQSQ	30.69	2592.21	1297.12	4.7	25.05
LEQC(+57.02)C(+57.02)QQLRQ(-18.01)	27.69	1343.61	672.811	0.4	33.51
GEMRGEEMRE	26.36	1222.51	612.261	0.4	40.07
GEMRGEEMREVME	26.09	1581.66	791.838	1.6	49.18
LEQC(+57.02)C(+57.02)QQL	24.73	1077.46	539.737	1	27.8
Q(-17.03)QGRRGESC(+57.02)RE	24.34	1344.6	449.206	0.1	1.74
I(+43.01)RSAR	21.97	644.372	323.193	-0.4	6
L(+42.01)PN(+.98)QC(+57.02)RLS(+79.97)PQRC(+57.02)E	21.43	1779.74	890.877	-2.2	7.18
TARDLPN	20.03	785.403	393.708	-1.3	10.23
I(+43.01)RSARF	20.03	791.44	396.728	0.4	38.33
Webb's Prize Nut, GluC Digest 2 [93 spectra & 77 peptides assigned (77 unique) / 72% sequence coverage / -10lgP = 322.82]
TARDLPNQC(+57.02)RLSPQRC(+57.02)E	109.85	2100	526.006	-0.5	28.72
TARDLPN(+.98)QC(+57.02)RLSPQRC(+57.02)E	81.15	2100.98	526.252	0	31.02
GLRQAVMQQQGEMRGEEMRE	79.06	2362.09	591.531	0.9	40.22
TARDLPNQC(+57.02)RLSPQRC(+57.02)	77.9	1970.95	493.745	-0.8	28.19
GLRQAVMQQQGEM(+15.99)RGEEMRE	74.4	2378.09	595.53	1	36.53
Q(-17.03)AQRQQNLNQC(+57.02)QRY	73.26	1816.84	909.429	2.4	25.85
Q(-17.03)AQRQQNLNQC(+57.02)QRYMRQQSQYG	67.8	2795.27	932.767	1.9	33.58
QAQRQQNLNQC(+57.02)QRY	62.98	1833.87	917.941	1.3	19.93
Q(-17.03)AQRQQNLNQC(+57.02)QRYM(+15.99)RQQSQYGSYD	62.79	3176.39	795.106	0.9	31.05
NQC(+57.02)RLSPQRC(+57.02)E	62.73	1446.65	724.331	1.1	28.87
GLRQAVMQQQGEMRGE(+129.04)	62.16	1945.91	973.962	0.4	37.06
QC(+57.02)C(+57.02)QQLRQMDE	61.89	1494.6	748.309	1.1	26.62
QC(+57.02)C(+57.02)QQLRQM(+15.99)DE	61.48	1510.6	756.305	-0.5	12.94
Q(-17.03)AQRQQNLNQC(+57.02)QRYMRQQSQYGSYD	59.96	3160.4	1054.47	1.4	36.48
GLRQAVMQQQGEM(+15.99)RGEEM(+15.99)RE	59.34	2394.08	599.529	1.5	29.57
QAQRQQNLNQC(+57.02)QRYM	58.48	1964.91	655.977	1.7	28.86
RC(+57.02)RC(+57.02)EGLRQAVMQQQGEMRGEEMREVME	57.83	3482.55	697.519	1.6	47.1
Q(-17.03)AQRQQNLNQC(+57.02)QRYMRQQSQY	57.47	2738.25	913.759	1.2	34.04
PNQC(+57.02)RLSPQRC(+57.02)E	55.59	1543.7	515.574	0.9	28.92
AVMQQQGEMRGEEMRE	54.52	1907.83	636.951	1.4	30.68
TARDLPNQC(+57.02)RLSPQRC(+57.02)EIRSA	54.09	2527.25	506.457	-1	32.99
RC(+57.02)RC(+57.02)EGLRQAVMQQQGEMRGEE	52.42	2707.22	677.812	0.5	36.24
RQQSQYGSYD	52.18	1230.53	616.271	0.1	13.92
QAQRQQNLNQC(+57.02)QRYMRQQSQYG	52.15	2812.3	938.443	3	30.39
TARDLPNQC(+57.02)RLSPQRC(+57.02)EIRS	52	2456.21	492.25	0.1	31.82
Q(+43.01)C(+57.02)C(+57.02)QQLRQMDE	51.41	1537.61	769.812	1	33.06
GLRQN(sub A)VMQQQGEMRGEE	51.39	1988.92	663.98	0.7	46.43
QAQRQQNLNQC(+57.02)QRYMRQQSQY	50.02	2755.28	689.827	1	30.81
QAVMQQQGEMRGEEMRE	49.97	2035.89	679.636	0.1	31.76
GR(sub L)RQAVMQQQGEMRGEEMREVME	49.9	2764.26	922.425	-3.6	57.1
VMETARDLPNQC(+57.02)RLSPQRC(+57.02)E	49.71	2459.15	820.724	1.2	36.07
QAQRQQNLNQC(+57.02)QRYMRQ	49.66	2249.07	563.273	-1	25.3
Q(-17.03)AQRQQNLNQC(+57.02)QRYMRQQSQYGS	47.84	2882.3	961.777	1	32.75
TARDLPNQC(+57.02)R	47.73	1229.59	410.871	-1.1	9.6
ETARDLPNQC(+57.02)RLSPQRC(+57.02)E	47.31	2229.04	744.02	0.8	36.02
VM(+15.99)ETARDLPNQC(+57.02)RLSPQRC(+57.02)E	47.23	2475.14	619.793	0.7	32.82
QC(+57.02)C(+57.02)QQLRQMD(-18.01)	47.02	1347.55	450.19	-0.4	26.77
QAQRQQNLNQC(+57.02)QRYM(+15.99)RQQSQYG	46.54	2828.29	708.082	1	24.15
QAQRQQNLNQC(+57.02)QRYMRQQSQYGS	45.25	2899.33	725.841	0.7	29.53
QAQRQQNLNQC(+57.02)QRYM(+15.99)RQQSQ	44.85	2608.21	653.06	0.7	16.34
TARDLPNQC(+57.02)RLSPQRC(+57.02)EIRSAR	44.27	2683.35	448.233	0.9	30.18
GR(sub L)RQAVMQQQGEMRGEEMRE	44.25	2405.11	802.708	-3.7	48.52
T(+43.01)ARDLPNQC(+57.02)RLSPQRC(+57.02)	43.28	2013.96	672.327	0.3	33.4
QAQRQQNLNQC(+57.02)QR	42.55	1670.8	557.942	1.2	3.53
MRGEEMREVME	39.73	1395.59	698.805	0.6	33.09
TARDLPNQC(+57.02)RLSPQ	39.37	1654.82	552.614	-0.8	29.88
TARDLPD(sub N)QC(+57.02)RLSPQRC(+57.02)EIRS	39.36	2457.2	492.446	-0.6	34.06
QAQRQQNLNQC(+57.02)QRYMRQQSQYGSY	37	3062.39	766.607	1.4	34.94
Q(-17.03)GRRGESC(+57.02)RE	36.95	1216.54	406.519	0	1.69
ERCRCEGLRE(sub Q)AVMQQQGEMRGEE	36.59	2723.2	681.81	4.2	33.25
LEQC(+57.02)C(+57.02)QQLRQMDE	36.38	1736.73	869.373	1.6	33.43
QAQRQQNLNQC(+57.02)QRYMRQ(+.98)	34.93	2250.05	751.024	0	27.09
MREVME	34.7	793.346	397.681	0.9	21.44
Q(-17.03)QGRRGESC(+57.02)RE	33.92	1344.6	449.205	-0.3	1.72
GLRQAVMQQQ(-18.01)	32.37	1139.59	570.801	0.5	40.19
MRGEEMRE	32.34	1036.44	519.228	-0.8	8.38
QAQRQQNLNQC(+57.02)QRYMRQQSQ	31.35	2592.21	649.061	0.5	25.08
M(+43.01)REVME	30.05	836.352	419.183	-0.6	37.09
IRSARF	29.51	748.434	375.225	0.7	19.8
QN(sub A)QRQQNLNQC(+57.02)QRYMRQQSQYG	29.32	2855.31	952.777	1.7	33.56
Q(+43.01)AQRQQNLNQC(+57.02)QRYMRQQSQYG	29.22	2855.31	714.834	1	33.52
ERC(+57.02)RC(+57.02)E	27.5	908.359	455.187	0	25.69
Q(-17.03)QQQQELE	27.31	1012.45	507.23	-0.3	19.71
QGEMRGEEMRE	27.22	1350.57	676.291	1.2	39.99
RC(+57.02)RC(+57.02)EGLRQAVMQQQGEMRGEEMREVP(sub M)D(sub E)	26.21	3434.55	573.432	-0.9	41.67
RC(+57.02)RC(+57.02)EGLR	26.1	1105.52	369.515	-0.7	2.73
LEQC(+57.02)C(+57.02)QQLRQM(+15.99)DERC(+57.02)RC(+57.02)E	26	2514.03	629.515	0.6	23.89
QC(+57.02)C(+57.02)QQLRQMDERC(+57.02)RC(+57.02)E	25.13	2255.91	564.985	0.8	25.59
GEMRGEEMRE	24.88	1222.51	612.261	0.9	40.04
QAQRQQNLNQC(+57.02)QRYM(+15.99)RQQSQYGS	24.54	2915.33	729.839	0.2	23.23
MREVM(+15.99)E	23.94	809.341	405.678	-0.2	9.08
C(+57.02)RLSPQRC(+57.02)EIRS	22.12	1560.76	521.261	-0.6	32
MREVM(-48.00)E	21.78	745.343	373.679	0.7	21.54
LEQC(+57.02)C(+57.02)QQLRQMD(-18.01)	21.02	1589.67	795.846	1.2	33.54
LEQC(+57.02)C(+57.02)QQL	20.41	1077.46	539.739	3.7	27.95
GLRQAVMQ(-18.01)	20.41	883.47	442.742	-0.2	40.12
RGEEMRE	20.41	905.403	453.708	-1.2	8.5
Katalonski, Tryptic Digest 1 [96 spectra & 82 peptides assigned (82 unique) / 72% sequence coverage / -10lgP = 449.70]
Q(-17.03)AVMQQQGEM(+15.99)RGEEMR	121.48	1905.81	636.279	0.7	31.47
Q(+43.01)QNLNQC(+57.02)QR	116.73	1230.55	616.284	0.3	7.39
Q(-17.03)QQELEQC(+57.02)C(+57.02)QQLR	116.14	1729.75	865.882	-0.9	39.77
H(sub Q)QQQQELEQC(+57.02)C(+57.02)QQLR	115.14	2011.9	671.64	2.1	30.03
QP(sub A)VMQQQGEMR	114.34	1330.61	666.313	-0.9	26.67
Q(-17.03)AVMQQQGEMRGEEMR(+14.02)	112.81	1903.83	635.619	0.6	42.17
Q(-17.03)QQQQELEQC(+57.02)C(+57.02)QQLR	110.49	1985.87	662.964	0.6	37.86
Q(-17.03)AVMQQQGEMR(+14.02)	109.56	1301.59	651.8	-0.4	38.92
Q(-17.03)AVMQQQGEMRGEEMR	109.23	1889.82	630.947	1	37.14
E(-18.01)EMREVMETAR	108.36	1361.61	681.812	1.1	34.7
Q(+380.15)QELEQC(+57.02)C(+57.02)QQLR	107.54	1998.87	667.296	-0.5	31.6
Q(-17.03)AVMQQQGEMR	107.13	1287.57	644.792	0.2	32.37
Q(+43.01)AVMQQQGEMR(+14.02)	106.26	1361.62	681.817	0.3	37.72
Q(+380.15)QQELEQC(+57.02)C(+57.02)QQLR	103.87	2126.92	709.982	-0.6	32.06
Q(+43.01)AVMQQQGEM(+15.99)RGEEMR	103.56	1965.85	656.289	-0.7	31.32
QAVMQQQGEM(+15.99)R(+14.02)	98.84	1334.61	668.312	1.4	19.05
QAVMQQQGEMR(+14.02)	98.38	1318.61	440.545	0.1	30.67
QAL(sub V)MQQQGEMRGEEMR	94.3	1920.86	641.294	-0.8	33.47
GEEMREVMETAR(+14.02)	92.67	1450.65	726.334	-0.2	40.51
GEEM(-48.00)REVMETAR	92.31	1388.64	463.885	-0.6	4.66
G(+43.01)EEMREVMETAR	91.58	1479.64	740.832	2.7	47.37
Q(-17.03)QNLNQC(+57.02)QR(+14.02)	89.13	1184.54	593.275	0.2	20.89
QAVMQQQGEM(-48.00)RGEEMR	85.63	1858.84	620.622	2.1	17.17
E(-18.01)MREVMETAR	85.06	1232.56	617.289	0.2	34.58
Q(+43.01)QNLNQC(+57.02)QR(+14.02)	85.06	1244.57	623.291	0.3	19.2
QAVMQQQGEMRGEEMREVM(+15.99)ETAR	84.83	2739.22	685.813	0.7	39.18
D(+43.01)LPNQC(+57.02)R	84.45	944.413	473.214	-0.2	18.07
E(+43.01)VMETAR	83.31	877.396	439.705	-0.2	26.56
Q(-17.03)QNLNQC(+57.02)QR	82.21	1170.52	586.267	0.2	9.19
TTITTVDVDEDIVNQQGR	82.14	2002.98	668.668	0.6	49.35
QAVMQQQGEM(+15.99)RGEEMR	80.96	1922.84	481.718	0.9	24.38
QQNLNQC(+57.02)QR(+14.02)	80.74	1201.56	601.789	1.2	7.26
QAVMQQQGEMR	78.53	1304.6	653.306	0.2	22.73
QAVMQQQ(-18.01)	78.14	813.38	407.697	0	22.91
QAVMQQQGEMRGEEMREL(sub V)METAR	78	2737.24	685.318	0.5	51.8
QAVMQQQGEM(+15.99)R	77.85	1320.59	661.303	0.8	7.08
QAVM(+15.99)QQQGEM(+15.99)RGEEMREVMETAR	77.04	2755.21	689.811	0.6	39.23
QP(sub A)VMQQQGEMRGEEMREVMETAR	76.74	2749.24	688.318	0.8	49.24
QQN(+15.99)LNQC(+57.02)QR	75.97	1203.54	602.778	0.6	9.51
QGEMRGEEMREVMETAR	75.8	2037.9	510.482	-1.4	39.4
E(-18.01)VMETAR	74.69	816.38	409.197	-1.8	6.02
QAVMQQQGEM(+15.99)RGEEMREVM(+15.99)ETAR	73.22	2755.21	689.811	0.1	35.43
EVMETAR(+14.02)	72.32	848.406	425.211	0.3	19.65
GEEM(+15.99)REVMETAR	72.17	1452.63	485.218	-0.2	21.93
QQS(sub N)LNQC(+57.02)QR	72.12	1160.54	581.275	0.5	2.89
GEEMREVMETAR	71.58	1436.64	479.887	-0.3	34.44
QP(sub A)L(sub V)MQQQGEMRGEEMR	71.47	1946.88	487.726	-0.1	34.2
QP(sub G)EMRGEEMREVMETAR	68.85	2077.93	520.491	-0.1	41.14
C(+57.02)EGLR(+14.02)	67.65	647.306	324.661	1	15.34
EMREVMETAR(+14.02)	67.64	1264.59	633.303	0.4	40.57
QP(sub A)L(sub V)MQQQGEMRGEEMREVMETAR	67.49	2763.26	691.822	0.8	49.44
GEEMREVM(+15.99)ETAR	67.4	1452.63	485.218	-0.3	24.79
DLPN(-17.03)QC(+57.02)R	66.63	884.381	443.199	1.6	5.27
Q(+43.01)AVMQQQGEMRGEEMR	66.53	1949.85	975.935	2.1	36.86
G(+127.06)ESC(+57.02)REQAQR	64.68	1346.6	674.307	0.3	1.97
QQQELEQC(+57.02)C(+57.02)QQLR	63.74	1746.78	583.266	-0.1	30.64
Q(-17.03)QQQELEQC(+57.02)C(+57.02)QQLR	62.42	1857.81	620.278	1	37.29
QQQQQELEQC(+57.02)C(+57.02)QQLR	62.32	2002.89	668.639	-0.3	33.64
QAVM(+15.99)QQQGEMRGEEMR	61.06	1922.84	641.953	-0.6	24.08
QQSQYGS(-18.01)	60.87	778.325	390.17	-0.2	16.27
QP(sub A)L(sub V)MQQQGEMRGEEM(+15.99)REVMETAR	59.53	2779.25	695.82	-0.2	40.04
VMQQQGEMR	59.27	1105.5	553.76	3.6	22.88
QP(sub A)L(sub V)MQQQGEMR	58.17	1344.63	673.322	1.1	29.06
MREVMETAR	57.67	1121.53	561.773	0.1	34.48
PNQC(+57.02)R(+14.02)	57.2	687.312	344.663	0.2	26.27
QP(sub A)L(sub V)MQQQGEM(+15.99)R	55.96	1360.62	681.319	1	19.99
QAVMQQQGEM(+15.99)RGEEM(+15.99)R	55.3	1938.83	647.285	-0.2	12.93
QP(sub A)L(sub V)MQQQGEM(+15.99)RGEEMR	55.05	1962.87	655.298	1	28.58
QP(sub A)L(sub V)MQQQGEMRA(sub G)EEMR	54.77	1960.89	654.638	0	39.06
QQSQYGSYD(-18.01)	54.75	1056.41	529.214	-0.6	16.31
QQQQE(+61.91)LEQC(+57.02)C(+57.02)QQLR	54.38	1936.75	485.195	-0.5	28.3
QAVMQQQGEMRGEEMR	54.02	1906.84	477.717	-2.5	30.24
H(sub Q)QQQELEQC(+57.02)C(+57.02)QQLR	52.75	1883.84	628.953	0.2	28.21
VMQQQGEMRGEEMR	51.96	1707.75	854.883	1.2	30.21
QC(+57.02)C(+57.02)QQLR	51.95	991.433	496.723	-0.5	28.38
DLPNQC(+57.02)R	51.69	901.408	451.711	0.2	18.18
QYGSYDH(sub G)T(sub S)NQQQQQELEQC(+57.02)C(+57.02)QQLR	50.95	3068.31	768.086	1.4	39.96
QQNLNQC(+57.02)QR	50.94	1187.55	396.856	-0.1	2.54
G(+43.01)EEM(+15.99)REVMETAR	50.5	1495.64	748.827	0	35.46
LEQC(+57.02)C(+57.02)QQQ(sub L)R	49.86	1248.53	625.273	-1.8	4.43
C(+57.02)RC(+57.02)EGLR	49.03	949.422	317.481	-0.1	2.83
L(+43.01)SPQR	48.33	642.345	322.18	0.2	14.29
Katalonski, Tryptic Digest 2 [126 spectra & 77 peptides assigned (77 unique) / 65% sequence coverage / -10lgP = 487.57]
Q(-17.03)AVMQQQGEM(+15.99)RGEEMR	140.92	1905.81	636.278	0	33.89
Q(-17.03)AVM(+15.99)QQQGEMRGEEMR	137.75	1905.81	636.278	-0.8	32.21
Q(-17.03)AVMQQQGEMRGEEMR	131.24	1889.82	630.946	-1.3	39.84
Q(-17.03)AVMQQQGEM(+15.99)R	129.6	1303.56	652.789	-1.2	27.96
Q(+43.01)AVMQQQGEMR	125.07	1347.6	674.807	-1.5	33.66
H(sub Q)QQQELEQC(+57.02)C(+57.02)QQLR	123.46	1883.84	942.926	0.1	30.49
Q(+43.01)QNLNQC(+57.02)QR	122.38	1230.55	616.283	-1.2	13.54
Q(+.98)AVMQQQGEMR	121.49	1305.58	653.797	-1	28.5
Q(-17.03)AVM(+15.99)QQQGEMR	120.75	1303.56	652.789	-0.6	26.62
Q(-17.03)QQQQELEQC(+57.02)C(+57.02)QQLR	119.57	1985.87	662.963	-0.4	40.2
Q(-17.03)AVMQQQGEMR	118.13	1287.57	644.792	0.1	33.18
TTITTVDVDEDIVNQQGR	116.46	2002.98	1002.5	0.4	53.75
QH(sub Q)QQELEQC(+57.02)C(+57.02)QQLR	112.47	1883.84	471.966	-2	30.51
Q(+43.01)AVM(+15.99)QQQGEMR	107.69	1363.6	682.806	-0.2	26.32
Q(-17.03)QELEQC(+57.02)C(+57.02)QQLR	105.22	1601.69	801.854	-0.1	40.7
QAVMQQQGEMR(+14.02)	102.61	1318.61	660.313	-0.6	33.28
Q(-17.03)QQQELEQC(+57.02)C(+57.02)QQLR	101.75	1857.81	620.277	-1.2	39.83
Q(-17.03)QQELEQC(+57.02)C(+57.02)QQLR	101.61	1729.75	577.591	-0.6	42.16
Q(-17.03)AVMQQQGEMR(+14.02)	100.68	1301.59	651.8	-0.7	41.59
QAL(sub V)MQQQGEMR	98.03	1318.61	660.313	-0.9	30.92
TVDVDEDIVNQQGR	97.82	1586.75	794.384	-0.2	40.8
ITTVDVDEDIVNQQGR	94.92	1800.89	901.45	0	51.83
QAVM(+15.99)Q(+.98)QQGEMR	94.83	1321.58	661.794	-0.9	14.93
QAVMQQ(+.98)QGEMR	94.47	1305.58	653.797	-1.1	29.07
QAVM(+15.99)QQQGEMRGEEMR	93.97	1922.84	641.955	2.1	27.48
Q(+.98)AVM(+15.99)QQQGEMR	92.94	1321.58	661.793	-3.3	14.13
QAVMQQQGEMR	92.72	1304.6	653.305	-1.3	27.17
Q(-17.03)QNLNQC(+57.02)QR	92.18	1170.52	586.266	-1.4	13.73
H(sub Q)QQQQELEQC(+57.02)C(+57.02)QQLR	91.8	2011.9	671.639	-0.8	32.24
QAVM(+15.99)QQQGEMR	91.55	1320.59	661.302	-1.7	11.26
QAVM(+15.99)QQQ(+.98)GEMRGEEMR	90.4	1923.82	642.282	0	28.9
QQQQQE(+37.03)LEQC(+57.02)C(+57.02)QQLR	89.62	2039.93	680.982	-1.4	34.54
QAVMQQQGEMRGEEMREVM(+15.99)ETAR	89.44	2739.22	685.812	-0.6	39.6
RGESC(+57.02)S(sub R)EQAQR	87.95	1306.57	654.29	-2.2	6.12
QAVM(+15.99)QQQGEM(+15.99)RGEEMR	87.77	1938.83	647.286	0.5	13.62
GEEM(+15.99)REVMETAR	87.69	1452.63	485.218	-1.6	26.62
QQSQYGSYDGSNH(sub Q)QQQQELEQC(+57.02)C(+57.02)QQLR	87.68	3326.41	832.609	0.4	40.08
QAVMQQQGEM(-48.00)RGEEMR	87.44	1858.84	620.621	-0.7	19.85
QAVMQQQGEM(+15.99)R	85.57	1320.59	661.302	-1.1	13.43
QAVMQQQGEMRGEEMREVMETAR	84.5	2723.22	681.813	-0.7	52.58
QAVM(+15.99)QQQGEMRGEEM(+15.99)R	84.11	1938.83	647.285	-1.2	14.71
Q(-17.03)QNLNQC(+57.02)Q(+.98)R	82.76	1171.5	586.759	-0.4	19.47
GEEMREVMETAR	82.34	1436.64	479.885	-3.3	38.32
E(+43.01)VMETAR	81.45	877.396	439.705	-1.1	30.11
QAVMQQQGEM(+15.99)RGEEMR	80.91	1922.84	481.716	-1.5	27.65
RQAVMQQQGEMR	79.67	1460.7	731.356	-0.5	25.61
GEEM(-48.00)REVMETAR	77.75	1388.64	463.884	-2.8	10.86
QAVMQQQGEM(+15.99)RGEEMREVMETAR	76.24	2739.22	685.812	-1	46.86
QQQQELEQC(+57.02)C(+57.02)QQLR	75.93	1874.84	625.952	-0.6	34.23
D(+43.01)LPNQC(+57.02)R	75.6	944.413	473.213	-1.7	25.52
QAVMQQQGEM(+15.99)RGEEM(+15.99)REVMETAR	75.38	2755.21	689.811	-0.6	35.15
QQQELEQC(+57.02)C(+57.02)QQLR	75.22	1746.78	874.396	0.1	32.98
Q(+380.15)QQELEQC(+57.02)C(+57.02)QQLR	73.71	2126.92	709.98	-2.9	34.56
QQN(+15.99)LNQC(+57.02)QR	71.63	1203.54	602.777	-1.5	14.62
E(-18.01)VMETAR	69.82	816.38	409.197	-1.4	13.13
QQS(sub N)LNQC(+57.02)QR	69.79	1160.54	581.274	-2.3	10.71
QAVMQQQ(-18.01)	69.75	813.38	407.697	-1.4	27.14
Q(-17.03)QNLN(+.98)QC(+57.02)QR	69.08	1171.5	586.759	0.2	18.75
DLPNQ(+.98)C(+57.02)R	67.74	902.392	452.202	-1.7	15.68
GESC(+57.02)S(sub R)EQAQR	65.96	1150.47	576.24	-0.8	5.48
QAVMQQQGEMRGEEMR	65.86	1906.84	636.621	-1.6	32.72
E(+14.02)VMETAR	65.62	848.406	425.21	-1	21.81
Q(+.98)QQQQELEQC(+57.02)C(+57.02)QQLR	65.33	2003.88	668.967	-0.4	36.1
QAL(sub V)MQQQGEMRGEEMR	64.82	1920.86	641.293	-1.2	35.7
Q(+43.01)QSQYGSYD	64.48	1117.43	559.722	-1.7	27.37
LEQC(+57.02)C(+57.02)QQLR	64	1233.56	617.785	-2.6	38.47
Q(-17.03)QSQYGSYD	63.95	1057.4	529.706	-1.5	28.04
DLPNQC(+57.02)R	63.19	901.408	451.71	-1.9	13.37
Q(-17.03)C(+57.02)C(+57.02)QQLR	62.75	974.406	488.21	-1.1	21.92
QAVM(+15.99)QQQGEMRGEEMREVMETAR	62.63	2739.22	685.812	0	45.51
QAVMQQQGE(+37.95)MRGEEMR	61.93	1944.79	487.204	-2.5	32.61
VMQQQGEMRGEEMR	61.65	1707.75	854.882	-0.2	32.45
EVME(+14.02)TAR	61.33	848.406	425.21	-1.1	22.28
Q(-17.03)NLNQC(+57.02)QR	60.1	1042.46	522.236	-3	19.12
EVMETAR	58.83	834.391	418.202	-1.3	12.1
VMQQQGEMR	58.81	1105.5	553.757	-1.1	34.69
DLPN(+.98)QC(+57.02)R	57.87	902.392	452.202	-1.4	15.22
Katalonski, GluC Digest 1 [92 spectra & 76 peptides assigned (76 unique) / 71% sequence coverage / -10lgP = 259.22]
TARDLPNQC(+57.02)RLSPQRC(+57.02)E	74.38	2100	526.006	-0.4	28.67
GLRQAVMQQQGEMRGEEM(+15.99)RE	70.07	2378.09	595.53	1.5	36.52
GLRQAVMQQQGEM(+15.99)RGEEMRE	69.83	2378.09	595.531	1.9	33.67
GLRQAVMQQQGEMRGEEMRE	65.56	2362.09	591.531	0.4	40.65
Q(-17.03)C(+57.02)C(+57.02)QQLRQMDE	61.33	1477.57	739.795	0.6	33.92
Q(-17.03)AQRQQNLNQC(+57.02)QRYMRQQSQ	58.05	2575.19	644.806	2.1	28.95
TARDLPNQC(+57.02)RLSPQRCEIRS	56.29	2399.19	480.845	-0.5	35.42
TARDLPNQC(+57.02)RLSPQRC(+57.02)	55.03	1970.95	493.745	-0.2	28.17
QAQRQQNLNQC(+57.02)QRYM	54.75	1964.91	983.462	2	28.85
QAQRQQNLNQC(+57.02)QRYMRQQSQYGSYD	53.41	3177.42	795.365	2.8	33.65
GLRQAVM(+15.99)QQQGEMRGEE	53.21	1961.9	654.976	0.9	33.2
TARDLPNQC(+57.02)RLSPQRC(+57.02)EIRSA	52.45	2527.25	506.457	-0.4	32.96
GR(sub L)RQAVMQQQGEMRGEEMRE	52.44	2405.11	602.283	-3.9	48.54
QC(+57.02)C(+57.02)QQLRQMDE	51.32	1494.6	748.308	0.6	26.52
GLRQAVMQQQGEMRGE(+129.04)	50.86	1945.91	649.644	0.1	37.02
LEQC(+57.02)CQQLRQMDE	49.93	1679.71	840.862	2	37.35
VMETARDLPNQC(+57.02)RLSPQRC(+57.02)E	49.47	2459.15	615.794	0.9	36.04
GLRQN(sub A)VMQQQGEMRGEE	49.36	1988.92	663.98	1.9	46.4
QAQRQQNLNQC(+57.02)QRY	49.27	1833.87	612.296	1.2	19.78
AVMQQQGEMRGEEMRE	48.66	1907.83	636.95	0.2	30.64
TARDLPNQC(+57.02)RLSPQRC(+57.02)EIRS	48.44	2456.21	492.249	-1.6	31.87
RC(+57.02)RC(+57.02)EGLRQAVMQQQGEMRGEEM(+15.99)RE	48.25	3139.39	628.887	0.7	35.89
RC(+57.02)RC(+57.02)EGLRQAVMQQQGEMRGEEMRE	48.18	3123.4	625.688	1.2	38.9
QAVMQQQGEMRGEEMRE	47.55	2035.89	679.637	1.1	31.74
NQC(+57.02)RLSPQRC(+57.02)E	47.49	1446.65	724.331	1.2	28.89
GR(sub L)RQAVMQQQGEMRGEEMREVME	47.26	2764.26	922.426	-2.6	57.07
RQQSQYGSYD	46.64	1230.53	616.271	0.9	13.67
Q(+43.01)C(+57.02)C(+57.02)QQLRQMDE	45.66	1537.61	769.812	1.3	32.99
VMETARDLPNQC(+57.02)RLSPQRC(+57.02)EIRS	45.47	2815.36	564.08	-0.4	37.78
RC(+57.02)RC(+57.02)EGLRQAVMQQQGEMRGEE	44.51	2707.22	542.451	0.7	36.32
QAQRQQN(-17.03)LNQC(+57.02)QRYMRQQSQY	43.62	2738.25	685.572	1.9	34.09
ETARDLPNQC(+57.02)RLSPQRC(+57.02)E	43.28	2229.04	744.021	1.8	36.05
TARDLPNQC(+57.02)RLSPQRC(+57.02)EIRSAR	43.03	2683.35	448.233	0.7	30.2
QAQRQQNLNQC(+57.02)QRYMRQQSQY	42.47	2755.28	689.827	1.1	30.79
LEQC(+57.02)C(+57.02)QQLRQMDERC(+57.02)RC(+57.02)EGLRQAVMQQQGEMRGEE	42.26	4425.93	886.196	2.4	44.7
QAQRQQNLNQC(+57.02)QRYMRQQSQYGS	41.32	2899.33	725.841	0.6	29.45
Q(+43.01)AQRQQNLNQC(+57.02)QRYMRQQSQ	40.09	2635.22	879.415	1.5	28.7
QAQRQQS(sub N)LNQC(+57.02)QRY	39.1	1806.85	603.293	1.8	21.16
METARDLPNQC(+57.02)RLSPQRC(+57.02)EIRS	38.93	2716.3	680.082	0.8	37.82
LEQC(+57.02)C(+57.02)QQLRQM(+15.99)DE	38.32	1752.72	877.37	2.1	24.83
GLRQN(sub A)VM(+15.99)QQQGEMRGEE	38.32	2004.91	669.311	0.6	42.52
QAQRQQNLNQC(+57.02)QRYM(+15.99)RQQSQ	37.81	2608.21	653.061	1.5	16.39
QC(+57.02)C(+57.02)QQLRQMD(-18.01)	37.64	1347.55	674.783	1.9	26.61
GRRGESC(+57.02)RE	36.62	1105.5	369.509	1.1	1.5
QAQRQQNLNQC(+57.02)QRYMRQQSQYG	36.58	2812.3	704.082	0.1	30.34
MRGEEMREVME	36.47	1395.59	698.806	1.4	33.1
QC(+57.02)RLSPQRC(+57.02)E	35.81	1332.6	667.308	-1.4	28.91
GLRQAVMQQ	35.01	1029.54	515.777	0.4	29.24
MRGEEMRE	31.71	1036.44	519.229	-0.1	8.03
MREVME	31.1	793.346	397.681	2.4	21.39
QAQRQQNLNQC(+57.02)QRYMRQQSQ	30.25	2592.21	865.08	1.8	24.94
QC(+57.02)C(+57.02)QQLRQMDERC(+57.02)RC(+57.02)E	29.21	2255.91	564.986	2.4	25.52
GRRGESC(+57.02)S(sub R)EQAQRQQNLNQC(+57.02)QRYMRQQSQ	28.87	3610.64	723.136	1.5	25.63
PNQC(+57.02)RLSPQRC(+57.02)E	28.01	1543.7	772.858	2.1	28.97
Q(-17.03)AQRQQNLNQC(+57.02)QRYMRQQSQY	27.75	2738.25	913.76	2.3	34.05
RC(+57.02)RC(+57.02)EGLRQAVM	27.69	1534.73	512.583	0.5	29.19
QAQRQQNLNQC(+57.02)QRYM(+15.99)RQQSQY	25.59	2771.27	693.828	3.6	24.61
QAQRQQS(sub N)LNQC(+57.02)QRYMRQQSQ	25	2565.2	642.309	1.5	25.82
QGEMRGEEMRE	25	1350.57	676.291	1.1	40.1
RC(+57.02)RC(+57.02)EGLRQAVMQQ	24.68	1790.85	597.955	-0.3	29.51
C(+57.02)RLSPQRC(+57.02)EIRS	23.9	1560.76	521.261	-0.3	32.17
Q(+43.01)AQRQQNLNQC(+57.02)QRYMRQQSQYG	23.88	2855.31	952.778	2	33.49
Q(-17.03)GRRGESC(+57.02)RE	23.56	1216.54	406.52	0.8	1.72
MREVM(+15.99)E	23.22	809.341	405.678	-0.7	8.85
QAQRQQNLNQC(+57.02)QRYMRQQSQYGSY	22.91	3062.39	766.607	1.7	34.98
Q(-17.03)QQQQELE	22.88	1012.45	507.231	0.8	19.54
ERC(+57.02)RC(+57.02)E	21.53	908.359	455.187	0.1	31.6
LEQC(+57.02)C(+57.02)QQLRQ(-18.01)	21.53	1343.61	672.812	1.9	33.6
D(sub Q)P(sub A)QRQQNLNQCQRYMRQQSQYGSYD	21.53	3133.38	1045.47	1.7	37.19
RC(+57.02)RC(+57.02)EGLRQAVMQ(-18.01)	20.58	1644.78	549.267	1.5	38.98
Q(-17.03)QGRRGESC(+57.02)RE	19.79	1344.6	449.206	0.6	1.74
M(+43.01)REVME	18.41	836.352	419.182	-2.2	37.04
LEQC(+57.02)C(+57.02)QQL	17.88	1077.46	539.736	0	27.93
Q(-17.03)QQQELE	15.12	884.388	443.201	0.3	19.19
Q(+43.01)AQRQQNLNQC(+57.02)QRYMRQQSQYGSYD	14.32	3220.43	1074.49	2.4	36.42
QAQRQQNLS(sub N)QC(+57.02)QRYMRQQSQ	13.24	2565.2	856.078	3.6	25.7
Katalonski, GluC Digest 2 [70 spectra & 55 peptides assigned (55 unique) / 71% sequence coverage / -10lgP = 306.50]
TARDLPNQC(+57.02)RLSPQRC(+57.02)E	100.24	2100	526.006	-0.3	28.81
LEQC(+57.02)C(+57.02)QQLRQMD(-18.01)	83.24	1589.67	530.9	1.7	33.71
TARDLPN(-17.03)QC(+57.02)RLSPQRC(+57.02)E	81.76	2082.97	521.751	4	28.84
Q(-17.03)AQRQQNLNQC(+57.02)QRYMRQQSQY	75.92	2738.25	685.572	2	34.09
GLRQAVMQQQGEMRGEEM(+15.99)RE	73.27	2378.09	595.53	0.8	36.56
GLRQAVMQQQGEM(+15.99)RGEEMRE	72.03	2378.09	595.53	0.8	33.79
Q(-17.03)AQRQQNLNQC(+57.02)QRYMRQQSQ	71.51	2575.19	644.805	1	29.04
Q(+43.01)C(+57.02)C(+57.02)QQLRQMDE	70.91	1537.61	769.812	1.8	33.09
GLRQAVMQQQGEMRGE(+129.04)	69.85	1945.91	649.646	2.6	37.09
Q(-17.03)AQRQQNLNQC(+57.02)QRYMRQQSQYGSYD	65.89	3160.4	1054.47	2.5	36.61
T(+43.01)ARDLPNQC(+57.02)RLSPQRC(+57.02)E	62.07	2143	715.342	1.3	33.87
TARDLPNQC(+57.02)RLSPQRC(+57.02)	60.64	1970.95	493.746	0.8	28.22
GR(sub L)RQAVMQQQGEMRGEEMRE	59.96	2405.11	602.283	-3.5	48.57
QAQRQQS(sub N)LNQC(+57.02)QRYMRQQSQ	58.91	2565.2	642.309	1.9	25.76
QAQRQQNLNQC(+57.02)QRYM	57.77	1964.91	655.976	0.6	28.86
RQQSQYGSYD	55.62	1230.53	616.271	1.5	13.95
GLRQAVMQQQGEMRGEEMRE	53.91	2362.09	788.373	1.6	40.03
RC(+57.02)RC(+57.02)EGLRQAVMQQQGEMRGEEMRE	53.02	3123.4	625.688	0.5	38.94
GLRQAVMQQQGEM(+15.99)RGEEM(+15.99)RE	52.94	2394.08	599.528	-0.4	29.64
QAQRQQNLNQC(+57.02)QRYMRQQSQYGSYD	52.56	3177.42	795.364	2.1	33.74
GLRQAVMQQQ(-18.01)	52.47	1139.59	570.802	2.8	40.18
TARDLPNQC(+57.02)RLSPQRC(+57.02)EIRS	51.35	2456.21	492.25	0.2	31.99
QAQRQQNLNQC(+57.02)QRYMRQQSQ	51.32	2592.21	649.062	0.9	25.04
GR(sub L)RQAVMQQQGEMRGEEMREVME	50.5	2764.26	922.425	-3.2	57.12
QAQRQQNLNQC(+57.02)QRYMRQQSQYGS	50.26	2899.33	725.841	0.4	29.52
VMETARDLPNQC(+57.02)RLSPQRC(+57.02)E	50.25	2459.15	615.794	0.9	36.07
QAQRQQNLNQC(+57.02)QRYM(+15.99)RQQSQ	48.86	2608.21	653.061	1.9	16.57
TARDLPNQC(+57.02)RLSPQRC(+57.02)EIRSA	48.31	2527.25	506.457	0.1	33.04
PNQC(+57.02)RLSPQRC(+57.02)E	48.18	1543.7	515.574	1.5	28.99
Q(+43.01)AQRQQNLNQC(+57.02)QRYMRQQSQ	48.14	2635.22	879.415	1.4	28.76
QC(+57.02)C(+57.02)QQLRQMDE	48	1494.6	499.208	0	26.68
Q(-17.03)QGRRGESC(+57.02)RE	47.92	1344.6	449.206	1.4	2.01
NQC(+57.02)RLSPQRC(+57.02)E	45.31	1446.65	724.332	2.5	28.96
GR(sub L)RQAVMQQQGEMRGEEM(+15.99)RE	45.2	2421.11	606.281	-3.9	45.28
RC(+57.02)RC(+57.02)EGLRQAVMQQQGEMRGEE	45.19	2707.22	677.812	0.8	36.31
TARDLPNQC(+57.02)RLSPQRC(+57.02)EIRSAR	45.02	2683.35	448.232	0.1	30.23
LEQC(+57.02)C(+57.02)QQLRQMDE	43.43	1736.73	579.917	1	33.6
QAQRQQNLNQC(+57.02)QRYMRQQSQY	43.25	2755.28	689.828	1.8	30.86
VMETARDLPNQC(+57.02)RLSPQRC(+57.02)EIRS	42.91	2815.36	564.08	0.3	37.81
GLRQAVMQQQGEMRGEEMREVP(sub M)D(sub E)	42.4	2673.24	669.319	1.6	42.84
QAQRQQNLNQC(+57.02)QRYM(+15.99)RQQSQYG	41.87	2828.29	708.082	2	24.11
Q(-17.03)QQQQELE	38.02	1012.45	507.23	-0.5	19.67
LEQC(+57.02)C(+57.02)QQLRQM(+15.99)DE	36.09	1752.72	585.249	0.4	24.88
MREVME	35.15	793.346	397.68	-0.6	21.65
QC(+57.02)RLSPQRC(+57.02)E	34.93	1332.6	667.308	-0.3	28.92
GLRQAVMQQQGEMRW(sub G)EEMREL(sub V)	32.41	2604.24	652.064	-4.1	48.39
Q(-17.03)QQQELE	31.33	884.388	443.201	-1.1	19.3
Q(-17.03)GRRGESC(+57.02)RE	31.32	1216.54	406.52	1.4	1.75
MRGEEMRE	29.84	1036.44	346.489	1.4	8.27
QAQRQQNLNQC(+57.02)QRYM(+15.99)RQQSQYGSYD	27.8	3193.42	799.362	1.1	37.25
Q(+43.01)AQRQQNLNQC(+57.02)QRYMRQQSQYGSYD	27.55	3220.43	1074.48	2.1	36.5
QC(+57.02)C(+57.02)QQLRQMDERC(+57.02)RC(+57.02)E	26.48	2255.91	564.985	0.7	25.56
QGEMRGEEMRE	25.33	1350.57	676.29	0.3	40.05
I(+43.01)RSAR	23.86	644.372	323.193	0.2	6.1
ERC(+57.02)RC(+57.02)E	22.78	908.359	455.187	-0.6	25.65

## Sheet: Table S-5
Table S-5: Identification of proteoforms by intact mass analysis. Given are the theoretical (calculated) monoisotopic mass, including pyroglutamate formation and carbamidomethylation, the observed mass (after deconvolution, averaging of charge states, and substraction of isotopic shifts), and the observed charge states (z).
Small subunit					Butler				Webb's Prize Nut				Katalonski
small SU	large SU	Modifications	calculated mass [Da]		observed mass [Da]	mass error [ppm]	z		observed mass [Da]	mass error [ppm]	z		observed mass [Da]	mass error [ppm]	z
sSU1-N0-C3		pyroglutamate, 2x carbamidomethylation (C)	4504.01		4504	-0.370781	3-6		4504	-0.573563	3-6		4504.01	-0.239585	3-6
sSU1-N0-C5		pyroglutamate, 2x carbamidomethylation (C)	4225.92		-				4225.91	-0.418844	5,6		4225.92	-0.205873	4-6
sSU1-N0-C6		pyroglutamate, 2x carbamidomethylation (C)	4138.88		4138.88	-0.653155	4-6		4138.88	-1.86282	3-6		4138.89	0.321343	4-6
sSU1-N0-C7		pyroglutamate, 2x carbamidomethylation (C)	4081.86		4081.86	-1.61773	4-6		4081.85	-2.52213	4-6		4081.86	-1.29924	3-6
sSU1-N0-C8		pyroglutamate, 2x carbamidomethylation (C)	3918.8		3918.79	-2.34	5,6		3918.8	-0.451669	3-6		3918.8	-0.489946	3-6
sSU1-N1-C3		pyroglutamate, 2x carbamidomethylation (C)	4375.95		4375.95	-0.516667	3-6		4375.95	-0.371084	3-6		4375.95	-0.439801	3-6
sSU1-N1-C5		pyroglutamate, 2x carbamidomethylation (C)	4097.86		-				4097.86	0.3815	4-6		4097.86	-0.0109813	5,6
sSU1-N1-C6		pyroglutamate, 2x carbamidomethylation (C)	4010.83		4010.82	-1.65469	4-6		4010.82	-1.88513	3-6		4010.82	-0.999794	3-6
sSU1-N1-C7		pyroglutamate, 2x carbamidomethylation (C)	3953.8		3953.8	-0.839698	3-6		3953.8	-0.690474	4-6		3953.8	-0.555162	3-6
sSU1-N1-C8		pyroglutamate, 2x carbamidomethylation (C)	3790.74		3790.74	0.883732	4-6		3790.74	-0.712262	3-6		3790.73	-2.19922	3-6
sSU1-N2-C3		2x carbamidomethylation (C)	4264.92		4264.91	-1.40891	3-6		4264.91	-1.3318	4-6		4264.91	-0.430645	3-6
sSU1-N2-C5		2x carbamidomethylation (C)	3986.83		-				-				-
sSU1-N2-C6		2x carbamidomethylation (C)	3899.79		3899.79	-0.928254	5,6		3899.79	-0.945349	4-6		3899.79	-0.505155	5,6
sSU1-N2-C7		2x carbamidomethylation (C)	3842.77		-				3842.77	-1.52754	5,6		3842.77	-1.12419	5,6
sSU1-N2-C8		2x carbamidomethylation (C)	3679.71		3679.71	0.275384	4-6		-				3679.7	-1.96211	5,6
sSU2-N0-C3		pyroglutamate, 2x carbamidomethylation (C)	4434.94		4434.94	0.358517	3-6		4434.94	-0.298889	3-6		4434.94	0.0405868	3-6
sSU2-N0-C5		pyroglutamate, 2x carbamidomethylation (C)	4156.85		-				-				4156.84	-0.858824	3-5
sSU2-N0-C6		pyroglutamate, 2x carbamidomethylation (C)	4069.82		4069.81	-0.0581517	3-5		4069.81	-1.07376	3-5		4069.81	-0.168137	3-5
sSU2-N0-C7		pyroglutamate, 2x carbamidomethylation (C)	4012.79						-				4012.8	0.929527	3-5
sSU2-N0-C8		pyroglutamate, 2x carbamidomethylation (C)	3849.73		-				3849.73	-0.784471	3-5		3849.73	-0.260624	3-5
sSU2-N1-C3		pyroglutamate, 2x carbamidomethylation (C)	4306.88		4306.88	0.0882309	3-6		4306.88	0.0198649	3-6		4306.88	0.113771	3-6
sSU2-N1-C5		pyroglutamate, 2x carbamidomethylation (C)	4028.79		-				-				4028.79	0.240767	3-5
sSU2-N1-C6		pyroglutamate, 2x carbamidomethylation (C)	3941.76		3941.76	-0.271453	3-5		3941.75	-1.5247	3-5		3941.75	-0.914144	3-5
sSU2-N1-C7		pyroglutamate, 2x carbamidomethylation (C)	3884.73		3884.73	-2.33478	4,5		3884.73	-1.72556	4,5		3884.73	-0.697602	3-5
sSU2-N1-C8		pyroglutamate, 2x carbamidomethylation (C)	3721.67		-				3721.67	-0.824898	3-5		3721.67	0.0797133	3-5
sSU2-N2-C3		2x carbamidomethylation (C)	4195.85		4195.84	-1.41886	3-6		4195.84	-1.7128	4-6		4195.85	-0.399337	3-6
sSU2-N2-C5		2x carbamidomethylation (C)	3917.76		-				-				3917.76	-0.336928	4,5
sSU2-N2-C6		2x carbamidomethylation (C)	3830.72		3830.71	-2.85064	4,5		-				3830.73	0.629994	3-5
sSU2-N2-C7		2x carbamidomethylation (C)	3773.7						-				-
sSU2-N2-C8		2x carbamidomethylation (C)	3610.64		-								-
sSU3-N0-C3		pyroglutamate, 2x carbamidomethylation (C)	4477		-				-				4476.99	-0.252401	3-6
sSU3-N0-C5		pyroglutamate, 2x carbamidomethylation (C)	4198.91		-				-				4198.9	-1.92193	5,6
sSU3-N0-C6		pyroglutamate, 2x carbamidomethylation (C)	4111.87		-				-				4111.87	-0.459645	3-6
sSU3-N0-C7		pyroglutamate, 2x carbamidomethylation (C)	4054.85		-				-				4054.85	-1.34078	5,6
sSU3-N0-C8		pyroglutamate, 2x carbamidomethylation (C)	3891.79		-				-				3891.79	-0.0796549	3-6
sSU3-N1-C3		pyroglutamate, 2x carbamidomethylation (C)	4348.94		-				-				4348.94	-0.152144	3-6
sSU3-N1-C5		pyroglutamate, 2x carbamidomethylation (C)	4070.85		-				-				4070.84	-1.00798	4-6
sSU3-N1-C6		pyroglutamate, 2x carbamidomethylation (C)	3983.81		-				-				3983.81	-0.532153	3-6
sSU3-N1-C7		pyroglutamate, 2x carbamidomethylation (C)	3926.79		-				-				3926.79	-0.501682	4-6
sSU3-N1-C8		pyroglutamate, 2x carbamidomethylation (C)	3763.73		-				-				3763.72	-2.44527	5,6
sSU3-N2-C3		2x carbamidomethylation (C)	4237.9		-				-				4237.91	0.424738	3-6
sSU3-N2-C5		2x carbamidomethylation (C)	3959.81		-				-				-
sSU3-N2-C6		2x carbamidomethylation (C)	3872.78		-				-				3872.78	0.253048	5,6
sSU3-N2-C7		2x carbamidomethylation (C)	3815.76		-				-				-
sSU3-N2-C8		2x carbamidomethylation (C)	3652.7		-				-				-
Large subunit					Butler				Webb's Prize Nut				Katalonski
small SU	large SU	Modifications	calculated mass [Da]		observed mass [Da]	mass error [ppm]	z		observed mass [Da]	mass error [ppm]	z		observed mass [Da]	mass error [ppm]	z
	lSU1-N0-C1	pyroglutamate, 6x carbamidomethylation (C)	8618.92		8618.92	0.360171	7-12		8618.92	-0.221606	7-11		8618.92	0.025912	6-11
	lSU1-N0-C2	pyroglutamate, 6x carbamidomethylation (C)	8462.82		8462.82	0.571914	7,8		-				-
	lSU1-N0-C3	pyroglutamate, 6x carbamidomethylation (C)	8391.78		8391.79	0.78847	6-10		8391.78	-0.0196079	5-10		8391.78	0.0830745	5-10
	lSU1-N1-C1	pyroglutamate, 6x carbamidomethylation (C)	8490.86		8490.86	0.303648	5-12		8490.86	-0.404973	7-11		8490.86	-0.460495	7-11
	lSU1-N1-C2	pyroglutamate, 6x carbamidomethylation (C)	8334.76		8334.77	0.814661	8-12		-				-
	lSU1-N1-C3	pyroglutamate, 6x carbamidomethylation (C)	8263.72		8263.73	0.803047	5-10		8263.72	-0.0774469	6-10		8263.72	0.164171	5-10
	lSU2-N0-C1	pyroglutamate, 6x carbamidomethylation (C)	8627.92		8627.92	0.0948747	5-13		8627.91	-0.62282	6-12		8627.92	-0.303955	6-12
	lSU2-N0-C2	pyroglutamate, 6x carbamidomethylation (C)	8471.82		8471.82	-0.0424938	7-10		-				-
	lSU2-N0-C3	pyroglutamate, 6x carbamidomethylation (C)	8400.78		8400.79	0.784451	5-12		8400.78	0.0434483	5-12		8400.78	-0.0855079	5-11
	lSU2-N1-C1	6x carbamidomethylation (C)	8516.89		8516.89	0.0969503	7-12		8516.87	-2.13223	10-12		8516.88	-1.31503	8-12
	lSU2-N1-C2	6x carbamidomethylation (C)	8360.79		8360.8	1.26065	7-9		-				-
	lSU2-N1-C3	6x carbamidomethylation (C)	8289.75		8289.75	0.492917	6-12		8289.75	-0.288136	6-12		8289.75	-0.385833	6-11
	lSU1/2-N2-C1	pyroglutamate, 6x carbamidomethylation (C)	8362.8		8362.81	0.52277	6-11		8362.79	-0.802363	9,10		8362.79	-1.54374	8-10
	lSU1/2-N2-C2	pyroglutamate, 6x carbamidomethylation (C)	8206.7		8206.71	0.754262	7-9		-				-
	lSU1/2-N2-C3	pyroglutamate, 6x carbamidomethylation (C)	8135.66		8135.67	0.817916	6-10		8135.66	0.077788	5-10		8135.66	-0.311591	6-10
	lSU1/2-N3-C1	pyroglutamate, 6x carbamidomethylation (C)	8234.74		8234.75	0.921705	9,10		-				-
	lSU1/2-N3-C2	pyroglutamate, 6x carbamidomethylation (C)	8078.64		-				-				-
	lSU1/2-N3-C3	pyroglutamate, 6x carbamidomethylation (C)	8007.6		8007.62	1.54104	7,8		-				8007.6	-0.0387132	7,8
Unreduced protein identifications					Butler				Webb's Prize Nut				Katalonski
small SU	large SU	Modifications	calculated mass [Da]		observed mass [Da]	mass error [ppm]	z		observed mass [Da]	mass error [ppm]	z		observed mass [Da]	mass error [ppm]	z
sSU1-N0-C3	lSU1-N0-C1	2x pyroglutamate, 4x disulfide bond	12658.7		12658.7	-1.35506	8-10		12658.7	-1.42669	8-10
	lSU1-N0-C3	2x pyroglutamate, 4x disulfide bond	12431.6		12431.5	-0.347503	7-11		12431.6	0.26304	8,9		12431.5	-0.380752	8-10
	lSU1-N1-C1	2x pyroglutamate, 4x disulfide bond	12530.6		12530.6	-1.24319	7-11
	lSU1-N1-C3	2x pyroglutamate, 4x disulfide bond	12303.5		12303.5	-0.839111	7-11		12303.5	-0.324705	8,9		12303.5	-0.616356	8-10
	lSU2-N0-C1	2x pyroglutamate, 4x disulfide bond	12667.7		12667.7	-1.1828	8-10		12667.7	-0.878613	8-10		12667.7	-0.351287	8,9
	lSU2-N0-C3	2x pyroglutamate, 4x disulfide bond	12440.6		12440.5	-1.0014	7-11		12440.5	-1.04127	7-11		12440.5	-0.218238	7-10
	lSU2-N1-C1	1x pyroglutamate, 4x disulfide bond	12556.7		12556.6	-2.43596	8-11		12556.6	-2.50863	8,9		12556.6	-2.33661	8,9
	lSU2-N1-C3	1x pyroglutamate, 4x disulfide bond	12329.5						12329.5	-2.53436	7-9,11		12329.5	-2.02576	8-10
	lSU1/2-N2-C1	2x pyroglutamate, 4x disulfide bond	12402.6		12402.6	-1.38262	7-11
	lSU1/2-N2-C3	2x pyroglutamate, 4x disulfide bond	12175.4		12175.4	-0.470209	7-10		12175.4	0.0936312	8,9		12175.4	0.210259	8-10
sSU1-N0-C5	lSU1-N0-C1	2x pyroglutamate, 4x disulfide bond
	lSU1-N0-C3	2x pyroglutamate, 4x disulfide bond
	lSU1-N1-C1	2x pyroglutamate, 4x disulfide bond
	lSU1-N1-C3	2x pyroglutamate, 4x disulfide bond
	lSU2-N0-C1	2x pyroglutamate, 4x disulfide bond
	lSU2-N0-C3	2x pyroglutamate, 4x disulfide bond	12162.5		12162.5	-0.560742	8,10		12162.4	-1.69538	8,10		12162.5	0.453855	8,9
	lSU2-N1-C1	1x pyroglutamate, 4x disulfide bond
	lSU2-N1-C3	1x pyroglutamate, 4x disulfide bond
	lSU1/2-N2-C1	2x pyroglutamate, 4x disulfide bond
	lSU1/2-N2-C3	2x pyroglutamate, 4x disulfide bond
sSU1-N0-C6	lSU1-N0-C1	2x pyroglutamate, 4x disulfide bond
	lSU1-N0-C3	2x pyroglutamate, 4x disulfide bond	12066.4
	lSU1-N1-C1	2x pyroglutamate, 4x disulfide bond
	lSU1-N1-C3	2x pyroglutamate, 4x disulfide bond	11938.4		11938.4	-1.16515	7-10		11938.3	-2.06645	8,9		11938.4	-1.21457	8,9
	lSU2-N0-C1	2x pyroglutamate, 4x disulfide bond
	lSU2-N0-C3	2x pyroglutamate, 4x disulfide bond	12075.4		12075.4	-1.52707	8-10		12075.4	-1.0627	7-9,11		12075.4	-0.860977	8-10
	lSU2-N1-C1	1x pyroglutamate, 4x disulfide bond
	lSU2-N1-C3	1x pyroglutamate, 4x disulfide bond	11964.4						11964.4	-2.19986	8-10		11964.4	-2.71472	9,10
	lSU1/2-N2-C1	2x pyroglutamate, 4x disulfide bond
	lSU1/2-N2-C3	2x pyroglutamate, 4x disulfide bond	11810.3		11810.3	-1.94519	8-10		11810.3	-1.97201	8,9		11810.3	-1.14561	8,9
sSU1-N0-C7	lSU1-N0-C1	2x pyroglutamate, 4x disulfide bond
	lSU1-N0-C3	2x pyroglutamate, 4x disulfide bond
	lSU1-N1-C1	2x pyroglutamate, 4x disulfide bond
	lSU1-N1-C3	2x pyroglutamate, 4x disulfide bond
	lSU2-N0-C1	2x pyroglutamate, 4x disulfide bond
	lSU2-N0-C3	2x pyroglutamate, 4x disulfide bond	12018.4
	lSU2-N1-C1	1x pyroglutamate, 4x disulfide bond
	lSU2-N1-C3	1x pyroglutamate, 4x disulfide bond
	lSU1/2-N2-C1	2x pyroglutamate, 4x disulfide bond
	lSU1/2-N2-C3	2x pyroglutamate, 4x disulfide bond
sSU1-N0-C8	lSU1-N0-C1	2x pyroglutamate, 4x disulfide bond
	lSU1-N0-C3	2x pyroglutamate, 4x disulfide bond
	lSU1-N1-C1	2x pyroglutamate, 4x disulfide bond
	lSU1-N1-C3	2x pyroglutamate, 4x disulfide bond
	lSU2-N0-C1	2x pyroglutamate, 4x disulfide bond
	lSU2-N0-C3	2x pyroglutamate, 4x disulfide bond	11855.3						11855.3	-0.948377	8-10		11855.3	-0.659196	7-10
	lSU2-N1-C1	1x pyroglutamate, 4x disulfide bond
	lSU2-N1-C3	1x pyroglutamate, 4x disulfide bond
	lSU1/2-N2-C1	2x pyroglutamate, 4x disulfide bond
	lSU1/2-N2-C3	2x pyroglutamate, 4x disulfide bond
sSU1-N1-C3	lSU1-N0-C1	2x pyroglutamate, 4x disulfide bond	12530.6		12530.6	-1.23521	7-11
	lSU1-N0-C3	2x pyroglutamate, 4x disulfide bond	12303.5		12303.5	-0.839111	7-11		12303.5	-0.324705	8,9		12303.5	-0.616356	8-10
	lSU1-N1-C1	2x pyroglutamate, 4x disulfide bond	12402.6		12402.6	-1.38262	7-11
	lSU1-N1-C3	2x pyroglutamate, 4x disulfide bond	12175.4		12175.4	-0.461996	7-10		12175.4	0.101844	8,9		12175.4	0.218473	8-10
	lSU2-N0-C1	2x pyroglutamate, 4x disulfide bond	12539.6		12539.6	-1.19509	7-11		12539.6	-1.11752	8-10		12539.6	-0.572585	8,9
	lSU2-N0-C3	2x pyroglutamate, 4x disulfide bond	12312.5		12312.5	-0.965198	7-11		12312.5	-0.857828	7-11		12312.5	-0.0357361	7-10
	lSU2-N1-C1	1x pyroglutamate, 4x disulfide bond	12428.6		12428.6	-2.31981	7-11		12428.6	-2.74609	9-11
	lSU2-N1-C3	1x pyroglutamate, 4x disulfide bond	12201.5		12201.4	-1.10847	7-10		12201.5	-0.820598	7-10		12201.5	-0.55731	8,9
	lSU1/2-N2-C1	2x pyroglutamate, 4x disulfide bond	12274.5		12274.5	-1.15748	8-11
	lSU1/2-N2-C3	2x pyroglutamate, 4x disulfide bond	12047.4		12047.4	-0.981334	7-10						12047.4	2.81846	8,9
sSU1-N1-C5	lSU1-N0-C1	2x pyroglutamate, 4x disulfide bond
	lSU1-N0-C3	2x pyroglutamate, 4x disulfide bond
	lSU1-N1-C1	2x pyroglutamate, 4x disulfide bond
	lSU1-N1-C3	2x pyroglutamate, 4x disulfide bond
	lSU2-N0-C1	2x pyroglutamate, 4x disulfide bond
	lSU2-N0-C3	2x pyroglutamate, 4x disulfide bond	12034.4						12034.4	-0.702569	8,9		12034.4	-0.843415	9,10
	lSU2-N1-C1	1x pyroglutamate, 4x disulfide bond
	lSU2-N1-C3	1x pyroglutamate, 4x disulfide bond	11923.4
	lSU1/2-N2-C1	2x pyroglutamate, 4x disulfide bond
	lSU1/2-N2-C3	2x pyroglutamate, 4x disulfide bond
sSU1-N1-C6	lSU1-N0-C1	2x pyroglutamate, 4x disulfide bond
	lSU1-N0-C3	2x pyroglutamate, 4x disulfide bond	11938.4		11938.4	-1.16515	7-10		11938.3	-2.06645	8,9		11938.4	-1.21457	8,9
	lSU1-N1-C1	2x pyroglutamate, 4x disulfide bond
	lSU1-N1-C3	2x pyroglutamate, 4x disulfide bond	11810.3		11810.3	-1.93673	8-10		11810.3	-1.96354	8,9		11810.3	-1.13714	8,9
	lSU2-N0-C1	2x pyroglutamate, 4x disulfide bond
	lSU2-N0-C3	2x pyroglutamate, 4x disulfide bond	11947.4		11947.4	-0.957812	8-10		11947.4	-0.718708	8-10		11947.4	-0.36326	9,10
	lSU2-N1-C1	1x pyroglutamate, 4x disulfide bond
	lSU2-N1-C3	1x pyroglutamate, 4x disulfide bond	11836.3		11836.3	-1.00538	8,9		11836.3	-0.758258	8,9
	lSU1/2-N2-C1	2x pyroglutamate, 4x disulfide bond
	lSU1/2-N2-C3	2x pyroglutamate, 4x disulfide bond	11682.3		11682.2	-2.20249	8-10		11682.2	-2.04013	8-10
sSU1-N1-C7	lSU1-N0-C1	2x pyroglutamate, 4x disulfide bond
	lSU1-N0-C3	2x pyroglutamate, 4x disulfide bond
	lSU1-N1-C1	2x pyroglutamate, 4x disulfide bond
	lSU1-N1-C3	2x pyroglutamate, 4x disulfide bond
	lSU2-N0-C1	2x pyroglutamate, 4x disulfide bond
	lSU2-N0-C3	2x pyroglutamate, 4x disulfide bond	11890.3						11890.3	-1.19971	8,9
	lSU2-N1-C1	1x pyroglutamate, 4x disulfide bond
	lSU2-N1-C3	1x pyroglutamate, 4x disulfide bond	11779.3		11779.3	-1.27257	8,9
	lSU1/2-N2-C1	2x pyroglutamate, 4x disulfide bond
	lSU1/2-N2-C3	2x pyroglutamate, 4x disulfide bond
sSU1-N1-C8	lSU1-N0-C1	2x pyroglutamate, 4x disulfide bond
	lSU1-N0-C3	2x pyroglutamate, 4x disulfide bond
	lSU1-N1-C1	2x pyroglutamate, 4x disulfide bond
	lSU1-N1-C3	2x pyroglutamate, 4x disulfide bond
	lSU2-N0-C1	2x pyroglutamate, 4x disulfide bond
	lSU2-N0-C3	2x pyroglutamate, 4x disulfide bond	11727.3		11727.3	-1.08039	8,9		11727.3	-0.690128	8-10		11727.3	-0.299089	7-10
	lSU2-N1-C1	1x pyroglutamate, 4x disulfide bond
	lSU2-N1-C3	1x pyroglutamate, 4x disulfide bond	11616.3						11616.2	-1.55472	9,10		11616.3	0.00494996	7-10
	lSU1/2-N2-C1	2x pyroglutamate, 4x disulfide bond
	lSU1/2-N2-C3	2x pyroglutamate, 4x disulfide bond	11462.2
sSU1-N2-C3	lSU1-N0-C1	1x pyroglutamate, 4x disulfide bond
	lSU1-N0-C3	1x pyroglutamate, 4x disulfide bond	12192.5
	lSU1-N1-C1	1x pyroglutamate, 4x disulfide bond
	lSU1-N1-C3	1x pyroglutamate, 4x disulfide bond	12064.4		12064.4	-0.31249	8,9
	lSU2-N0-C1	1x pyroglutamate, 4x disulfide bond
	lSU2-N0-C3	1x pyroglutamate, 4x disulfide bond	12201.5		12201.4	-1.10847	7-10		12201.5	-0.820598	7-10		12201.5	-0.55731	8,9
	lSU2-N1-C1	4x disulfide bond
	lSU2-N1-C3	4x disulfide bond	12090.4
	lSU1/2-N2-C1	1x pyroglutamate, 4x disulfide bond
	lSU1/2-N2-C3	1x pyroglutamate, 4x disulfide bond
sSU1-N2-C5	lSU1-N0-C1	1x pyroglutamate, 4x disulfide bond
	lSU1-N0-C3	1x pyroglutamate, 4x disulfide bond
	lSU1-N1-C1	1x pyroglutamate, 4x disulfide bond
	lSU1-N1-C3	1x pyroglutamate, 4x disulfide bond
	lSU2-N0-C1	1x pyroglutamate, 4x disulfide bond
	lSU2-N0-C3	1x pyroglutamate, 4x disulfide bond	11923.4
	lSU2-N1-C1	4x disulfide bond
	lSU2-N1-C3	4x disulfide bond
	lSU1/2-N2-C1	1x pyroglutamate, 4x disulfide bond
	lSU1/2-N2-C3	1x pyroglutamate, 4x disulfide bond
sSU1-N2-C6	lSU1-N0-C1	1x pyroglutamate, 4x disulfide bond
	lSU1-N0-C3	1x pyroglutamate, 4x disulfide bond
	lSU1-N1-C1	1x pyroglutamate, 4x disulfide bond
	lSU1-N1-C3	1x pyroglutamate, 4x disulfide bond
	lSU2-N0-C1	1x pyroglutamate, 4x disulfide bond
	lSU2-N0-C3	1x pyroglutamate, 4x disulfide bond	11836.3		11836.3	-1.00538	8,9		11836.3	-0.758258	8,9
	lSU2-N1-C1	4x disulfide bond
	lSU2-N1-C3	4x disulfide bond
	lSU1/2-N2-C1	1x pyroglutamate, 4x disulfide bond
	lSU1/2-N2-C3	1x pyroglutamate, 4x disulfide bond
sSU1-N2-C7	lSU1-N0-C1	1x pyroglutamate, 4x disulfide bond
	lSU1-N0-C3	1x pyroglutamate, 4x disulfide bond
	lSU1-N1-C1	1x pyroglutamate, 4x disulfide bond
	lSU1-N1-C3	1x pyroglutamate, 4x disulfide bond
	lSU2-N0-C1	1x pyroglutamate, 4x disulfide bond
	lSU2-N0-C3	1x pyroglutamate, 4x disulfide bond	11779.3		11779.3	-1.27257	8,9
	lSU2-N1-C1	4x disulfide bond
	lSU2-N1-C3	4x disulfide bond
	lSU1/2-N2-C1	1x pyroglutamate, 4x disulfide bond
	lSU1/2-N2-C3	1x pyroglutamate, 4x disulfide bond
sSU1-N2-C8	lSU1-N0-C1	1x pyroglutamate, 4x disulfide bond
	lSU1-N0-C3	1x pyroglutamate, 4x disulfide bond
	lSU1-N1-C1	1x pyroglutamate, 4x disulfide bond
	lSU1-N1-C3	1x pyroglutamate, 4x disulfide bond
	lSU2-N0-C1	1x pyroglutamate, 4x disulfide bond
	lSU2-N0-C3	1x pyroglutamate, 4x disulfide bond	11616.3						11616.2	-1.55472	9,10		11616.3	0.00494996	7-10
	lSU2-N1-C1	4x disulfide bond
	lSU2-N1-C3	4x disulfide bond
	lSU1/2-N2-C1	1x pyroglutamate, 4x disulfide bond
	lSU1/2-N2-C3	1x pyroglutamate, 4x disulfide bond
sSU2-N0-C3	lSU1-N0-C1	2x pyroglutamate, 4x disulfide bond	12589.6		12589.6	-1.44444	7-10		12589.6	-1.25844	8-10
	lSU1-N0-C3	2x pyroglutamate, 4x disulfide bond	12362.5		12362.5	-0.669768	7-11		12362.5	-0.838559	8-10		12362.5	-0.374925	7-10
	lSU1-N1-C1	2x pyroglutamate, 4x disulfide bond	12461.6		12461.5	-1.14384	7-11
	lSU1-N1-C3	2x pyroglutamate, 4x disulfide bond	12234.4		12234.4	-0.802449	7-10		12234.4	-0.620381	7-11		12234.4	-0.201889	7-11
	lSU2-N0-C1	2x pyroglutamate, 4x disulfide bond
	lSU2-N0-C3	2x pyroglutamate, 4x disulfide bond
	lSU2-N1-C1	1x pyroglutamate, 4x disulfide bond
	lSU2-N1-C3	1x pyroglutamate, 4x disulfide bond
	lSU1/2-N2-C1	2x pyroglutamate, 4x disulfide bond	12333.5		12333.5	-1.04782	7,8,10
	lSU1/2-N2-C3	2x pyroglutamate, 4x disulfide bond	12106.4		12106.4	-0.63669	7-11		12106.4	-0.318841	7-10		12106.4	-0.0266389	7-10
sSU2-N0-C5	lSU1-N0-C1	2x pyroglutamate, 4x disulfide bond
	lSU1-N0-C3	2x pyroglutamate, 4x disulfide bond
	lSU1-N1-C1	2x pyroglutamate, 4x disulfide bond
	lSU1-N1-C3	2x pyroglutamate, 4x disulfide bond
	lSU2-N0-C1	2x pyroglutamate, 4x disulfide bond
	lSU2-N0-C3	2x pyroglutamate, 4x disulfide bond	12093.4
	lSU2-N1-C1	1x pyroglutamate, 4x disulfide bond
	lSU2-N1-C3	1x pyroglutamate, 4x disulfide bond
	lSU1/2-N2-C1	2x pyroglutamate, 4x disulfide bond
	lSU1/2-N2-C3	2x pyroglutamate, 4x disulfide bond
sSU2-N0-C6	lSU1-N0-C1	2x pyroglutamate, 4x disulfide bond
	lSU1-N0-C3	2x pyroglutamate, 4x disulfide bond
	lSU1-N1-C1	2x pyroglutamate, 4x disulfide bond
	lSU1-N1-C3	2x pyroglutamate, 4x disulfide bond	11869.3						11869.3	-0.0379129	8-10		11869.3	0.143648	7-10
	lSU2-N0-C1	2x pyroglutamate, 4x disulfide bond
	lSU2-N0-C3	2x pyroglutamate, 4x disulfide bond
	lSU2-N1-C1	1x pyroglutamate, 4x disulfide bond
	lSU2-N1-C3	1x pyroglutamate, 4x disulfide bond
	lSU1/2-N2-C1	2x pyroglutamate, 4x disulfide bond
	lSU1/2-N2-C3	2x pyroglutamate, 4x disulfide bond	11741.2		11741.2	-0.783563	8,9		11741.3	1.60417	8,9		11741.3	1.81603	7-10
sSU2-N0-C7	lSU1-N0-C1	2x pyroglutamate, 4x disulfide bond
	lSU1-N0-C3	2x pyroglutamate, 4x disulfide bond
	lSU1-N1-C1	2x pyroglutamate, 4x disulfide bond
	lSU1-N1-C3	2x pyroglutamate, 4x disulfide bond
	lSU2-N0-C1	2x pyroglutamate, 4x disulfide bond
	lSU2-N0-C3	2x pyroglutamate, 4x disulfide bond
	lSU2-N1-C1	1x pyroglutamate, 4x disulfide bond
	lSU2-N1-C3	1x pyroglutamate, 4x disulfide bond
	lSU1/2-N2-C1	2x pyroglutamate, 4x disulfide bond
	lSU1/2-N2-C3	2x pyroglutamate, 4x disulfide bond
sSU2-N0-C8	lSU1-N0-C1	2x pyroglutamate, 4x disulfide bond
	lSU1-N0-C3	2x pyroglutamate, 4x disulfide bond
	lSU1-N1-C1	2x pyroglutamate, 4x disulfide bond
	lSU1-N1-C3	2x pyroglutamate, 4x disulfide bond	11649.2						11649.2	-1.22154	8,10		11649.2	0.0609483	7-10
	lSU2-N0-C1	2x pyroglutamate, 4x disulfide bond
	lSU2-N0-C3	2x pyroglutamate, 4x disulfide bond
	lSU2-N1-C1	1x pyroglutamate, 4x disulfide bond
	lSU2-N1-C3	1x pyroglutamate, 4x disulfide bond
	lSU1/2-N2-C1	2x pyroglutamate, 4x disulfide bond
	lSU1/2-N2-C3	2x pyroglutamate, 4x disulfide bond	11521.2						11521.1	-0.990352	8,9		11521.2	0.120214	7,9,10
sSU2-N1-C3	lSU1-N0-C1	2x pyroglutamate, 4x disulfide bond	12461.6		12461.5	-1.13581	7-11
	lSU1-N0-C3	2x pyroglutamate, 4x disulfide bond	12234.4		12234.4	-0.802449	7-10		12234.4	-0.620381	7-11		12234.4	-0.201889	7-11
	lSU1-N1-C1	2x pyroglutamate, 4x disulfide bond
	lSU1-N1-C3	2x pyroglutamate, 4x disulfide bond	12106.4		12106.4	-0.62843	7-11		12106.4	-0.31058	7-10		12106.4	-0.0183788	7-10
	lSU2-N0-C1	2x pyroglutamate, 4x disulfide bond
	lSU2-N0-C3	2x pyroglutamate, 4x disulfide bond
	lSU2-N1-C1	1x pyroglutamate, 4x disulfide bond
	lSU2-N1-C3	1x pyroglutamate, 4x disulfide bond
	lSU1/2-N2-C1	2x pyroglutamate, 4x disulfide bond	12205.4
	lSU1/2-N2-C3	2x pyroglutamate, 4x disulfide bond	11978.3		11978.3	-0.543691	7-10		11978.3	0.769725	8-10		11978.3	0.465564	8-10
sSU2-N1-C5	lSU1-N0-C1	2x pyroglutamate, 4x disulfide bond
	lSU1-N0-C3	2x pyroglutamate, 4x disulfide bond
	lSU1-N1-C1	2x pyroglutamate, 4x disulfide bond
	lSU1-N1-C3	2x pyroglutamate, 4x disulfide bond
	lSU2-N0-C1	2x pyroglutamate, 4x disulfide bond
	lSU2-N0-C3	2x pyroglutamate, 4x disulfide bond
	lSU2-N1-C1	1x pyroglutamate, 4x disulfide bond
	lSU2-N1-C3	1x pyroglutamate, 4x disulfide bond
	lSU1/2-N2-C1	2x pyroglutamate, 4x disulfide bond
	lSU1/2-N2-C3	2x pyroglutamate, 4x disulfide bond
sSU2-N1-C6	lSU1-N0-C1	2x pyroglutamate, 4x disulfide bond
	lSU1-N0-C3	2x pyroglutamate, 4x disulfide bond	11869.3						11869.3	-0.0379129	8-10		11869.3	0.143648	7-10
	lSU1-N1-C1	2x pyroglutamate, 4x disulfide bond
	lSU1-N1-C3	2x pyroglutamate, 4x disulfide bond	11741.2		11741.2	-0.775046	8,9		11741.3	1.61269	8,9		11741.3	1.82455	7-10
	lSU2-N0-C1	2x pyroglutamate, 4x disulfide bond
	lSU2-N0-C3	2x pyroglutamate, 4x disulfide bond
	lSU2-N1-C1	1x pyroglutamate, 4x disulfide bond
	lSU2-N1-C3	1x pyroglutamate, 4x disulfide bond
	lSU1/2-N2-C1	2x pyroglutamate, 4x disulfide bond
	lSU1/2-N2-C3	2x pyroglutamate, 4x disulfide bond	11613.2										11613.2	0.733362	7-9
sSU2-N1-C7	lSU1-N0-C1	2x pyroglutamate, 4x disulfide bond
	lSU1-N0-C3	2x pyroglutamate, 4x disulfide bond
	lSU1-N1-C1	2x pyroglutamate, 4x disulfide bond
	lSU1-N1-C3	2x pyroglutamate, 4x disulfide bond
	lSU2-N0-C1	2x pyroglutamate, 4x disulfide bond
	lSU2-N0-C3	2x pyroglutamate, 4x disulfide bond
	lSU2-N1-C1	1x pyroglutamate, 4x disulfide bond
	lSU2-N1-C3	1x pyroglutamate, 4x disulfide bond
	lSU1/2-N2-C1	2x pyroglutamate, 4x disulfide bond
	lSU1/2-N2-C3	2x pyroglutamate, 4x disulfide bond
sSU2-N1-C8	lSU1-N0-C1	2x pyroglutamate, 4x disulfide bond
	lSU1-N0-C3	2x pyroglutamate, 4x disulfide bond	11649.2						11649.2	-1.22154	8,10		11649.2	0.0609483	7-10
	lSU1-N1-C1	2x pyroglutamate, 4x disulfide bond
	lSU1-N1-C3	2x pyroglutamate, 4x disulfide bond	11521.2						11521.1	-0.981672	8,9		11521.2	0.128893	7,9,10
	lSU2-N0-C1	2x pyroglutamate, 4x disulfide bond
	lSU2-N0-C3	2x pyroglutamate, 4x disulfide bond
	lSU2-N1-C1	1x pyroglutamate, 4x disulfide bond
	lSU2-N1-C3	1x pyroglutamate, 4x disulfide bond
	lSU1/2-N2-C1	2x pyroglutamate, 4x disulfide bond
	lSU1/2-N2-C3	2x pyroglutamate, 4x disulfide bond	11393.1
sSU2-N2-C3	lSU1-N0-C1	1x pyroglutamate, 4x disulfide bond	12350.5		12350.5	-1.81774	9,10
	lSU1-N0-C3	1x pyroglutamate, 4x disulfide bond	12123.4		12123.4	-1.208	8,9		12123.4	-1.94211	8,9		12123.4	-1.72683	7-10
	lSU1-N1-C1	1x pyroglutamate, 4x disulfide bond	12222.5
	lSU1-N1-C3	1x pyroglutamate, 4x disulfide bond	11995.3		11995.3	-0.0237592	8,9
	lSU2-N0-C1	1x pyroglutamate, 4x disulfide bond
	lSU2-N0-C3	1x pyroglutamate, 4x disulfide bond
	lSU2-N1-C1	4x disulfide bond
	lSU2-N1-C3	4x disulfide bond
	lSU1/2-N2-C1	1x pyroglutamate, 4x disulfide bond
	lSU1/2-N2-C3	1x pyroglutamate, 4x disulfide bond	11867.3
sSU2-N2-C5	lSU1-N0-C1	1x pyroglutamate, 4x disulfide bond
	lSU1-N0-C3	1x pyroglutamate, 4x disulfide bond
	lSU1-N1-C1	1x pyroglutamate, 4x disulfide bond
	lSU1-N1-C3	1x pyroglutamate, 4x disulfide bond
	lSU2-N0-C1	1x pyroglutamate, 4x disulfide bond
	lSU2-N0-C3	1x pyroglutamate, 4x disulfide bond
	lSU2-N1-C1	4x disulfide bond
	lSU2-N1-C3	4x disulfide bond
	lSU1/2-N2-C1	1x pyroglutamate, 4x disulfide bond
	lSU1/2-N2-C3	1x pyroglutamate, 4x disulfide bond
sSU2-N2-C6	lSU1-N0-C1	1x pyroglutamate, 4x disulfide bond
	lSU1-N0-C3	1x pyroglutamate, 4x disulfide bond	11758.3
	lSU1-N1-C1	1x pyroglutamate, 4x disulfide bond
	lSU1-N1-C3	1x pyroglutamate, 4x disulfide bond	11630.2
	lSU2-N0-C1	1x pyroglutamate, 4x disulfide bond
	lSU2-N0-C3	1x pyroglutamate, 4x disulfide bond
	lSU2-N1-C1	4x disulfide bond
	lSU2-N1-C3	4x disulfide bond
	lSU1/2-N2-C1	1x pyroglutamate, 4x disulfide bond
	lSU1/2-N2-C3	1x pyroglutamate, 4x disulfide bond
sSU2-N2-C7	lSU1-N0-C1	1x pyroglutamate, 4x disulfide bond
	lSU1-N0-C3	1x pyroglutamate, 4x disulfide bond
	lSU1-N1-C1	1x pyroglutamate, 4x disulfide bond
	lSU1-N1-C3	1x pyroglutamate, 4x disulfide bond	11573.2
	lSU2-N0-C1	1x pyroglutamate, 4x disulfide bond
	lSU2-N0-C3	1x pyroglutamate, 4x disulfide bond
	lSU2-N1-C1	4x disulfide bond
	lSU2-N1-C3	4x disulfide bond
	lSU1/2-N2-C1	1x pyroglutamate, 4x disulfide bond
	lSU1/2-N2-C3	1x pyroglutamate, 4x disulfide bond
sSU2-N2-C8	lSU1-N0-C1	1x pyroglutamate, 4x disulfide bond
	lSU1-N0-C3	1x pyroglutamate, 4x disulfide bond
	lSU1-N1-C1	1x pyroglutamate, 4x disulfide bond
	lSU1-N1-C3	1x pyroglutamate, 4x disulfide bond
	lSU2-N0-C1	1x pyroglutamate, 4x disulfide bond
	lSU2-N0-C3	1x pyroglutamate, 4x disulfide bond
	lSU2-N1-C1	4x disulfide bond
	lSU2-N1-C3	4x disulfide bond
	lSU1/2-N2-C1	1x pyroglutamate, 4x disulfide bond
	lSU1/2-N2-C3	1x pyroglutamate, 4x disulfide bond
sSU3-N0-C3	lSU1-N0-C1	2x pyroglutamate, 4x disulfide bond
	lSU1-N0-C3	2x pyroglutamate, 4x disulfide bond
	lSU1-N1-C1	2x pyroglutamate, 4x disulfide bond
	lSU1-N1-C3	2x pyroglutamate, 4x disulfide bond
	lSU2-N0-C1	2x pyroglutamate, 4x disulfide bond	12640.7										12640.7	-0.566162	8-10
	lSU2-N0-C3	2x pyroglutamate, 4x disulfide bond	12413.5										12413.5	-0.509121	7-9
	lSU2-N1-C1	1x pyroglutamate, 4x disulfide bond
	lSU2-N1-C3	1x pyroglutamate, 4x disulfide bond	12302.5										12302.5	-1.92102	8-10
	lSU1/2-N2-C1	2x pyroglutamate, 4x disulfide bond
	lSU1/2-N2-C3	2x pyroglutamate, 4x disulfide bond
sSU3-N0-C5	lSU1-N0-C1	2x pyroglutamate, 4x disulfide bond
	lSU1-N0-C3	2x pyroglutamate, 4x disulfide bond
	lSU1-N1-C1	2x pyroglutamate, 4x disulfide bond
	lSU1-N1-C3	2x pyroglutamate, 4x disulfide bond
	lSU2-N0-C1	2x pyroglutamate, 4x disulfide bond
	lSU2-N0-C3	2x pyroglutamate, 4x disulfide bond
	lSU2-N1-C1	1x pyroglutamate, 4x disulfide bond
	lSU2-N1-C3	1x pyroglutamate, 4x disulfide bond
	lSU1/2-N2-C1	2x pyroglutamate, 4x disulfide bond
	lSU1/2-N2-C3	2x pyroglutamate, 4x disulfide bond
sSU3-N0-C6	lSU1-N0-C1	2x pyroglutamate, 4x disulfide bond
	lSU1-N0-C3	2x pyroglutamate, 4x disulfide bond
	lSU1-N1-C1	2x pyroglutamate, 4x disulfide bond
	lSU1-N1-C3	2x pyroglutamate, 4x disulfide bond
	lSU2-N0-C1	2x pyroglutamate, 4x disulfide bond
	lSU2-N0-C3	2x pyroglutamate, 4x disulfide bond	12048.4										12048.4	-0.742421	8,9
	lSU2-N1-C1	1x pyroglutamate, 4x disulfide bond
	lSU2-N1-C3	1x pyroglutamate, 4x disulfide bond
	lSU1/2-N2-C1	2x pyroglutamate, 4x disulfide bond
	lSU1/2-N2-C3	2x pyroglutamate, 4x disulfide bond
sSU3-N0-C7	lSU1-N0-C1	2x pyroglutamate, 4x disulfide bond
	lSU1-N0-C3	2x pyroglutamate, 4x disulfide bond
	lSU1-N1-C1	2x pyroglutamate, 4x disulfide bond
	lSU1-N1-C3	2x pyroglutamate, 4x disulfide bond
	lSU2-N0-C1	2x pyroglutamate, 4x disulfide bond
	lSU2-N0-C3	2x pyroglutamate, 4x disulfide bond
	lSU2-N1-C1	1x pyroglutamate, 4x disulfide bond
	lSU2-N1-C3	1x pyroglutamate, 4x disulfide bond
	lSU1/2-N2-C1	2x pyroglutamate, 4x disulfide bond
	lSU1/2-N2-C3	2x pyroglutamate, 4x disulfide bond
sSU3-N0-C8	lSU1-N0-C1	2x pyroglutamate, 4x disulfide bond
	lSU1-N0-C3	2x pyroglutamate, 4x disulfide bond
	lSU1-N1-C1	2x pyroglutamate, 4x disulfide bond
	lSU1-N1-C3	2x pyroglutamate, 4x disulfide bond
	lSU2-N0-C1	2x pyroglutamate, 4x disulfide bond
	lSU2-N0-C3	2x pyroglutamate, 4x disulfide bond	11828.3										11828.3	-2.18825	7-9
	lSU2-N1-C1	1x pyroglutamate, 4x disulfide bond
	lSU2-N1-C3	1x pyroglutamate, 4x disulfide bond	11717.3
	lSU1/2-N2-C1	2x pyroglutamate, 4x disulfide bond
	lSU1/2-N2-C3	2x pyroglutamate, 4x disulfide bond
sSU3-N1-C3	lSU1-N0-C1	2x pyroglutamate, 4x disulfide bond
	lSU1-N0-C3	2x pyroglutamate, 4x disulfide bond
	lSU1-N1-C1	2x pyroglutamate, 4x disulfide bond
	lSU1-N1-C3	2x pyroglutamate, 4x disulfide bond
	lSU2-N0-C1	2x pyroglutamate, 4x disulfide bond	12512.6										12512.6	-0.5613	8-10
	lSU2-N0-C3	2x pyroglutamate, 4x disulfide bond	12285.5										12285.5	-0.315006	7-10
	lSU2-N1-C1	1x pyroglutamate, 4x disulfide bond
	lSU2-N1-C3	1x pyroglutamate, 4x disulfide bond	12174.5										12174.4	-0.517477	7,8,10
	lSU1/2-N2-C1	2x pyroglutamate, 4x disulfide bond
	lSU1/2-N2-C3	2x pyroglutamate, 4x disulfide bond
sSU3-N1-C5	lSU1-N0-C1	2x pyroglutamate, 4x disulfide bond
	lSU1-N0-C3	2x pyroglutamate, 4x disulfide bond
	lSU1-N1-C1	2x pyroglutamate, 4x disulfide bond
	lSU1-N1-C3	2x pyroglutamate, 4x disulfide bond
	lSU2-N0-C1	2x pyroglutamate, 4x disulfide bond
	lSU2-N0-C3	2x pyroglutamate, 4x disulfide bond
	lSU2-N1-C1	1x pyroglutamate, 4x disulfide bond
	lSU2-N1-C3	1x pyroglutamate, 4x disulfide bond
	lSU1/2-N2-C1	2x pyroglutamate, 4x disulfide bond
	lSU1/2-N2-C3	2x pyroglutamate, 4x disulfide bond
sSU3-N1-C6	lSU1-N0-C1	2x pyroglutamate, 4x disulfide bond
	lSU1-N0-C3	2x pyroglutamate, 4x disulfide bond
	lSU1-N1-C1	2x pyroglutamate, 4x disulfide bond
	lSU1-N1-C3	2x pyroglutamate, 4x disulfide bond
	lSU2-N0-C1	2x pyroglutamate, 4x disulfide bond
	lSU2-N0-C3	2x pyroglutamate, 4x disulfide bond	11920.4										11920.4	0.0343949	9,10
	lSU2-N1-C1	1x pyroglutamate, 4x disulfide bond
	lSU2-N1-C3	1x pyroglutamate, 4x disulfide bond
	lSU1/2-N2-C1	2x pyroglutamate, 4x disulfide bond
	lSU1/2-N2-C3	2x pyroglutamate, 4x disulfide bond
sSU3-N1-C7	lSU1-N0-C1	2x pyroglutamate, 4x disulfide bond
	lSU1-N0-C3	2x pyroglutamate, 4x disulfide bond
	lSU1-N1-C1	2x pyroglutamate, 4x disulfide bond
	lSU1-N1-C3	2x pyroglutamate, 4x disulfide bond
	lSU2-N0-C1	2x pyroglutamate, 4x disulfide bond
	lSU2-N0-C3	2x pyroglutamate, 4x disulfide bond
	lSU2-N1-C1	1x pyroglutamate, 4x disulfide bond
	lSU2-N1-C3	1x pyroglutamate, 4x disulfide bond
	lSU1/2-N2-C1	2x pyroglutamate, 4x disulfide bond
	lSU1/2-N2-C3	2x pyroglutamate, 4x disulfide bond
sSU3-N1-C8	lSU1-N0-C1	2x pyroglutamate, 4x disulfide bond
	lSU1-N0-C3	2x pyroglutamate, 4x disulfide bond
	lSU1-N1-C1	2x pyroglutamate, 4x disulfide bond
	lSU1-N1-C3	2x pyroglutamate, 4x disulfide bond
	lSU2-N0-C1	2x pyroglutamate, 4x disulfide bond
	lSU2-N0-C3	2x pyroglutamate, 4x disulfide bond	11700.3										11700.3	-1.0165	8-10
	lSU2-N1-C1	1x pyroglutamate, 4x disulfide bond
	lSU2-N1-C3	1x pyroglutamate, 4x disulfide bond	11589.2
	lSU1/2-N2-C1	2x pyroglutamate, 4x disulfide bond
	lSU1/2-N2-C3	2x pyroglutamate, 4x disulfide bond
sSU3-N2-C3	lSU1-N0-C1	1x pyroglutamate, 4x disulfide bond
	lSU1-N0-C3	1x pyroglutamate, 4x disulfide bond
	lSU1-N1-C1	1x pyroglutamate, 4x disulfide bond
	lSU1-N1-C3	1x pyroglutamate, 4x disulfide bond
	lSU2-N0-C1	1x pyroglutamate, 4x disulfide bond
	lSU2-N0-C3	1x pyroglutamate, 4x disulfide bond	12174.5
	lSU2-N1-C1	4x disulfide bond
	lSU2-N1-C3	4x disulfide bond
	lSU1/2-N2-C1	1x pyroglutamate, 4x disulfide bond
	lSU1/2-N2-C3	1x pyroglutamate, 4x disulfide bond
sSU3-N2-C5	lSU1-N0-C1	1x pyroglutamate, 4x disulfide bond
	lSU1-N0-C3	1x pyroglutamate, 4x disulfide bond
	lSU1-N1-C1	1x pyroglutamate, 4x disulfide bond
	lSU1-N1-C3	1x pyroglutamate, 4x disulfide bond
	lSU2-N0-C1	1x pyroglutamate, 4x disulfide bond
	lSU2-N0-C3	1x pyroglutamate, 4x disulfide bond
	lSU2-N1-C1	4x disulfide bond
	lSU2-N1-C3	4x disulfide bond
	lSU1/2-N2-C1	1x pyroglutamate, 4x disulfide bond
	lSU1/2-N2-C3	1x pyroglutamate, 4x disulfide bond
sSU3-N2-C6	lSU1-N0-C1	1x pyroglutamate, 4x disulfide bond
	lSU1-N0-C3	1x pyroglutamate, 4x disulfide bond
	lSU1-N1-C1	1x pyroglutamate, 4x disulfide bond
	lSU1-N1-C3	1x pyroglutamate, 4x disulfide bond
	lSU2-N0-C1	1x pyroglutamate, 4x disulfide bond
	lSU2-N0-C3	1x pyroglutamate, 4x disulfide bond
	lSU2-N1-C1	4x disulfide bond
	lSU2-N1-C3	4x disulfide bond
	lSU1/2-N2-C1	1x pyroglutamate, 4x disulfide bond
	lSU1/2-N2-C3	1x pyroglutamate, 4x disulfide bond
sSU3-N2-C7	lSU1-N0-C1	1x pyroglutamate, 4x disulfide bond
	lSU1-N0-C3	1x pyroglutamate, 4x disulfide bond
	lSU1-N1-C1	1x pyroglutamate, 4x disulfide bond
	lSU1-N1-C3	1x pyroglutamate, 4x disulfide bond
	lSU2-N0-C1	1x pyroglutamate, 4x disulfide bond
	lSU2-N0-C3	1x pyroglutamate, 4x disulfide bond
	lSU2-N1-C1	4x disulfide bond
	lSU2-N1-C3	4x disulfide bond
	lSU1/2-N2-C1	1x pyroglutamate, 4x disulfide bond
	lSU1/2-N2-C3	1x pyroglutamate, 4x disulfide bond
sSU3-N2-C8	lSU1-N0-C1	1x pyroglutamate, 4x disulfide bond
	lSU1-N0-C3	1x pyroglutamate, 4x disulfide bond
	lSU1-N1-C1	1x pyroglutamate, 4x disulfide bond
	lSU1-N1-C3	1x pyroglutamate, 4x disulfide bond
	lSU2-N0-C1	1x pyroglutamate, 4x disulfide bond
	lSU2-N0-C3	1x pyroglutamate, 4x disulfide bond	11589.2
	lSU2-N1-C1	4x disulfide bond
	lSU2-N1-C3	4x disulfide bond
	lSU1/2-N2-C1	1x pyroglutamate, 4x disulfide bond
	lSU1/2-N2-C3	1x pyroglutamate, 4x disulfide bond
